# Supplementary material for: A Comprehensive Analysis of METTL1 to Immunity and Stemness in Pan-Cancer
Source: PubMed Central journal article supplement (PMC9008260; doi:10.3389/fimmu.2022.795240), 2022-03-31

# Cancer: HNSC

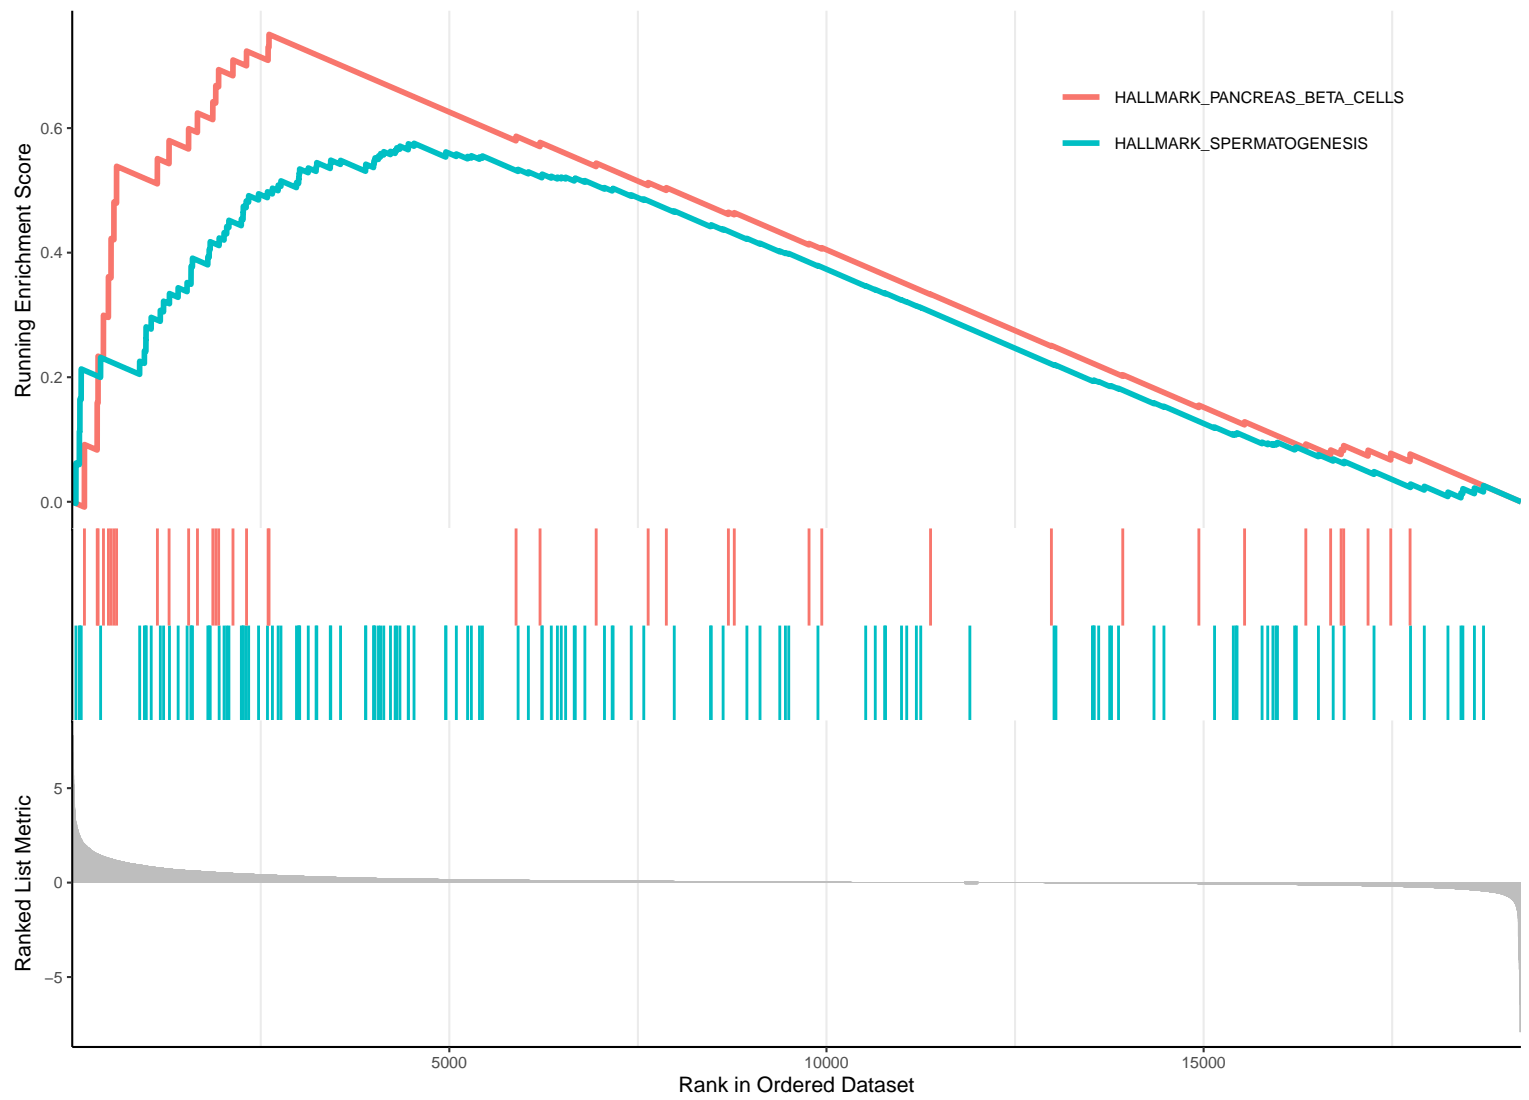

Cancer: KIRP

HALLMARK\_MYC\_TARGETS\_V2

Running Enrichment Score

Ranked List Metric

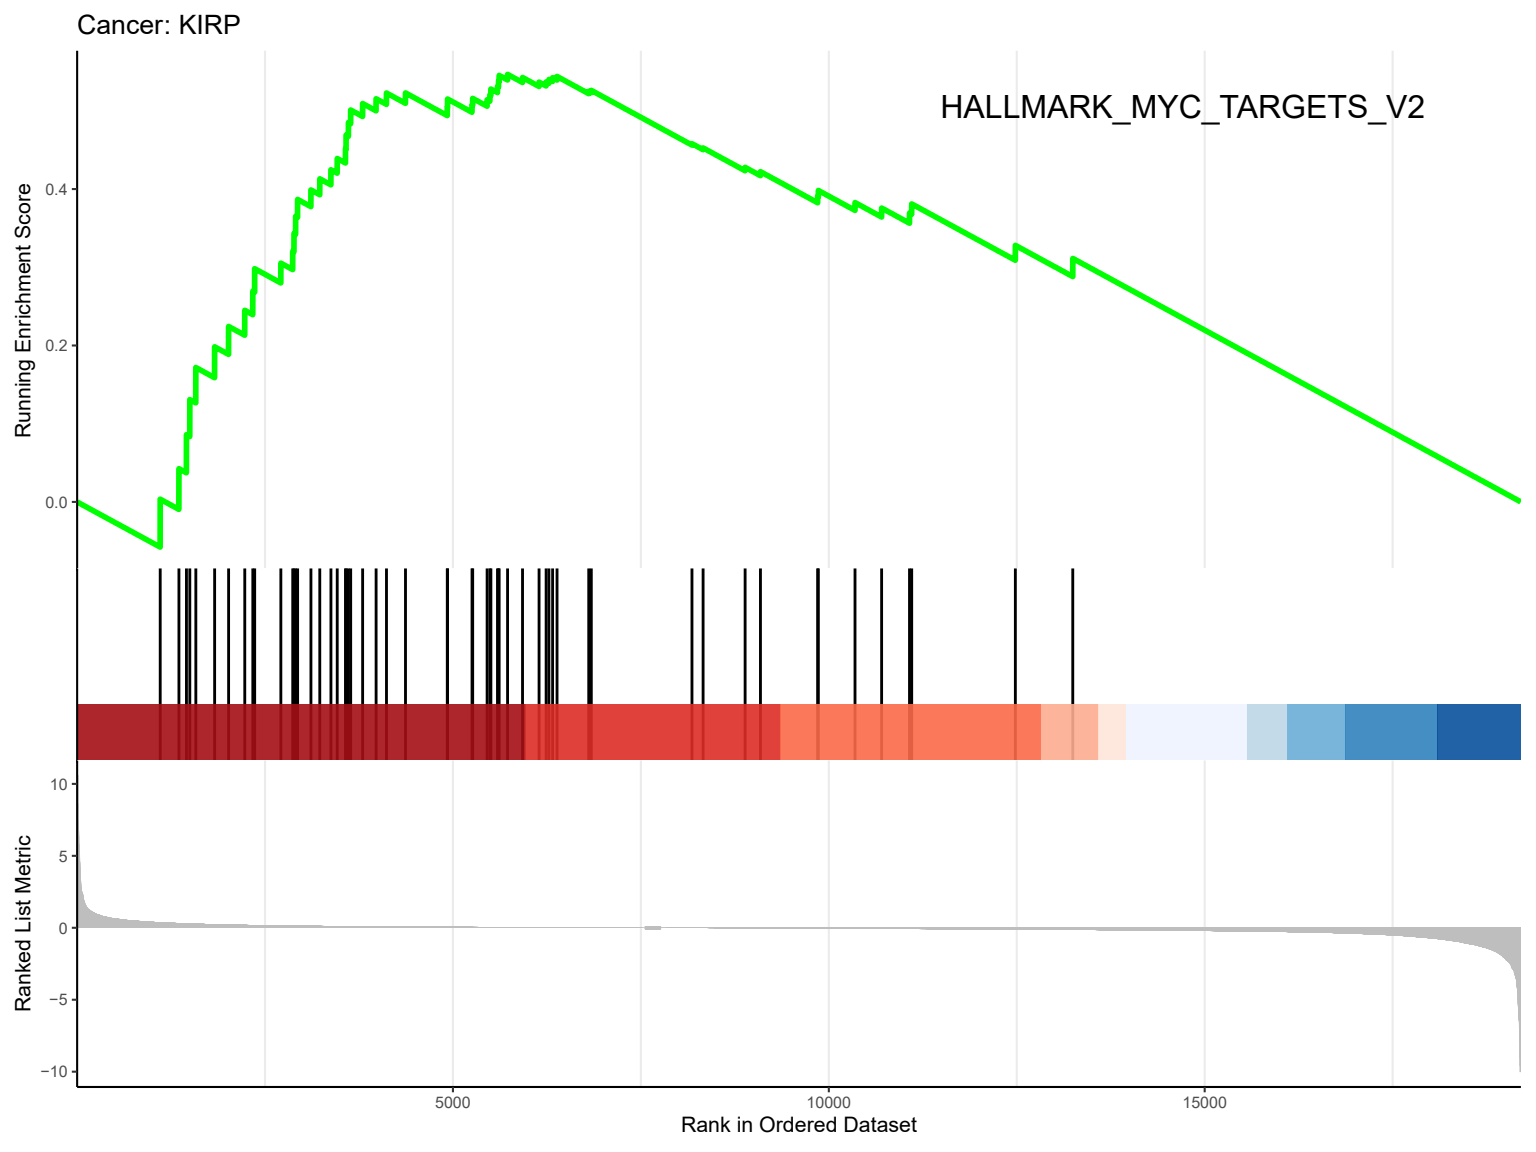

# Cancer: LAML

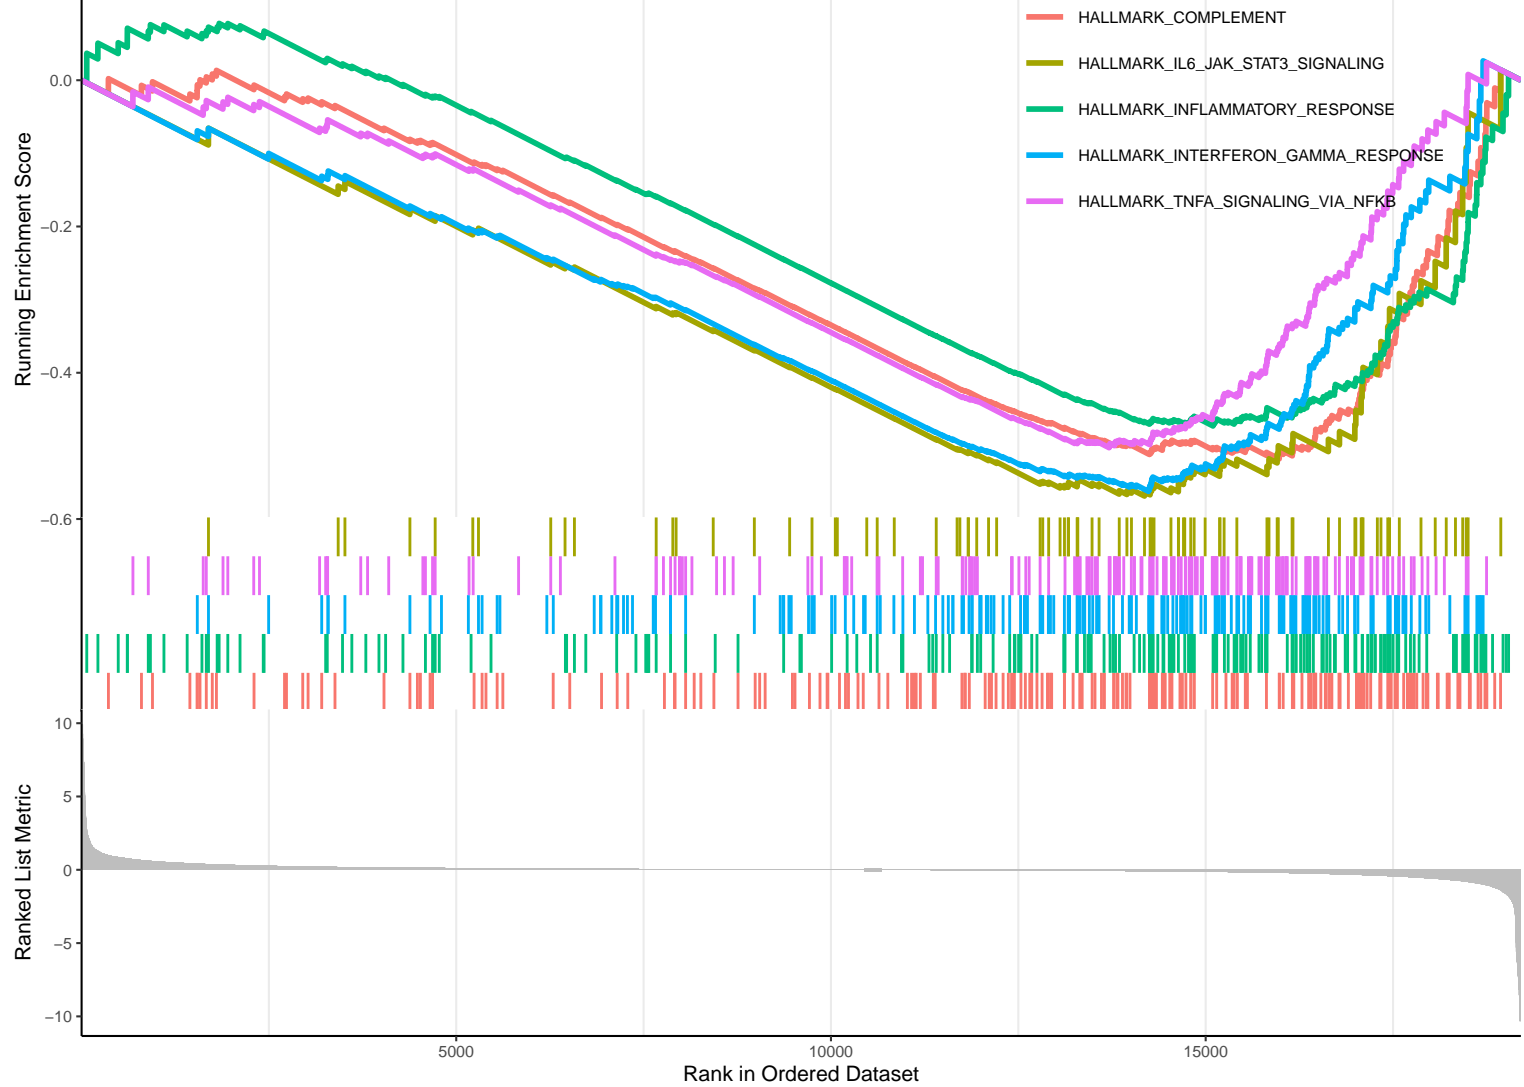

# Cancer: LUAD

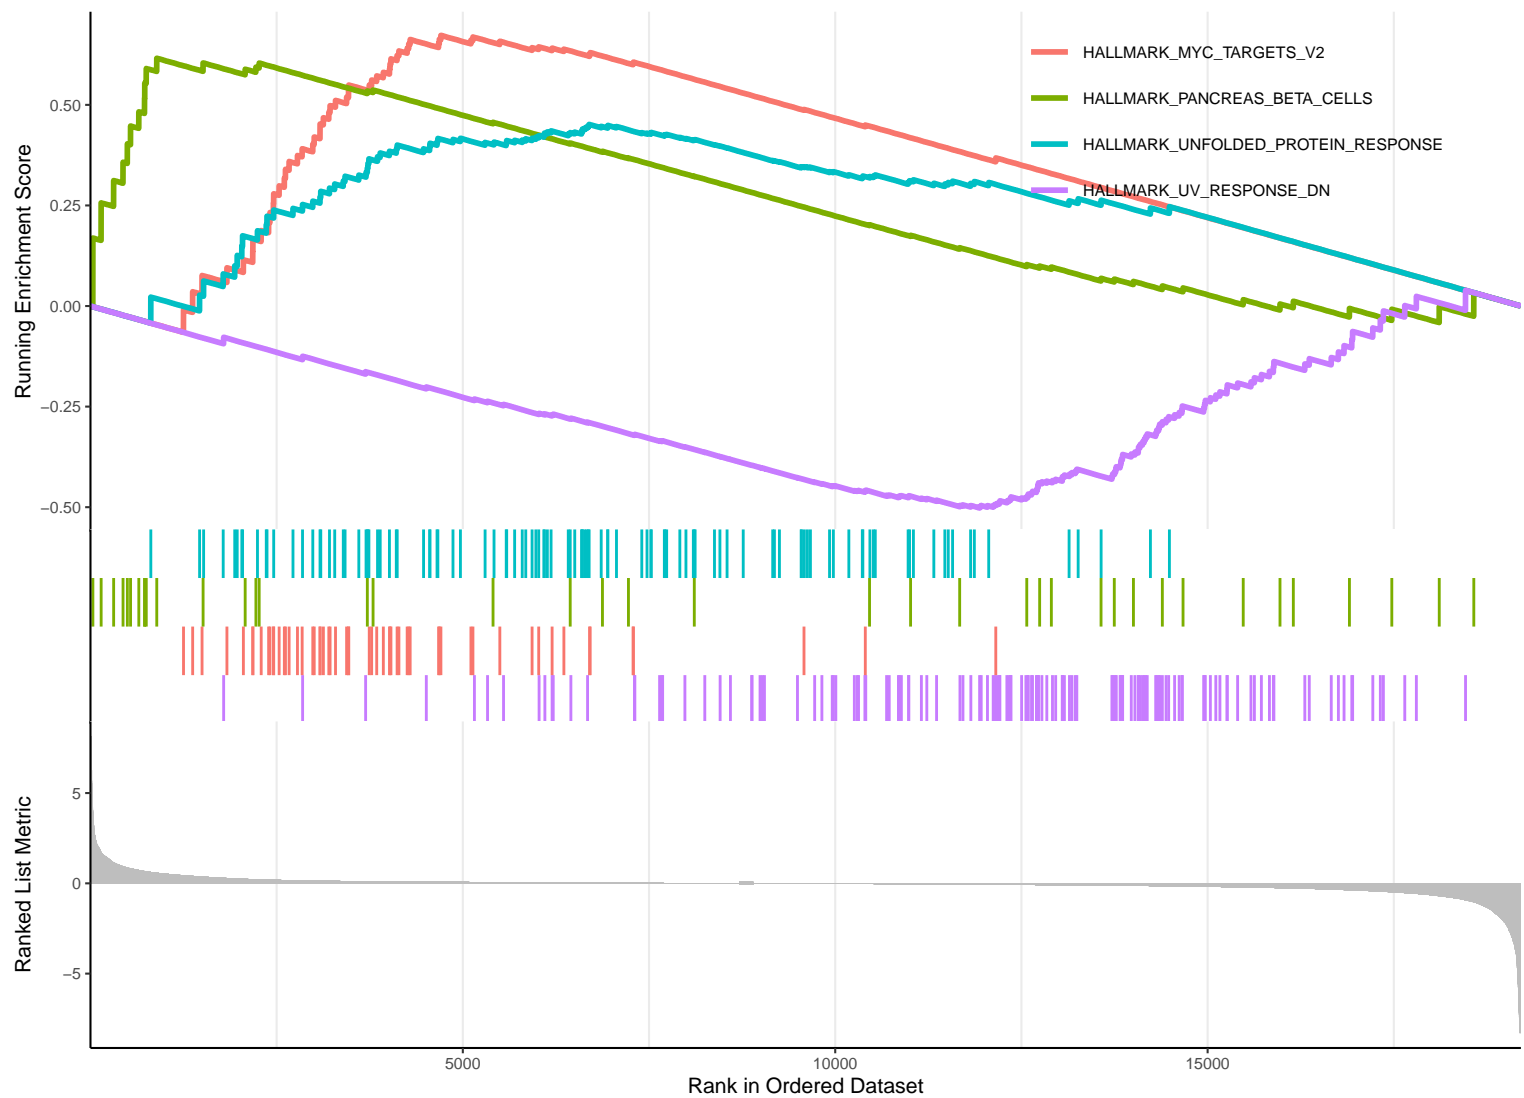

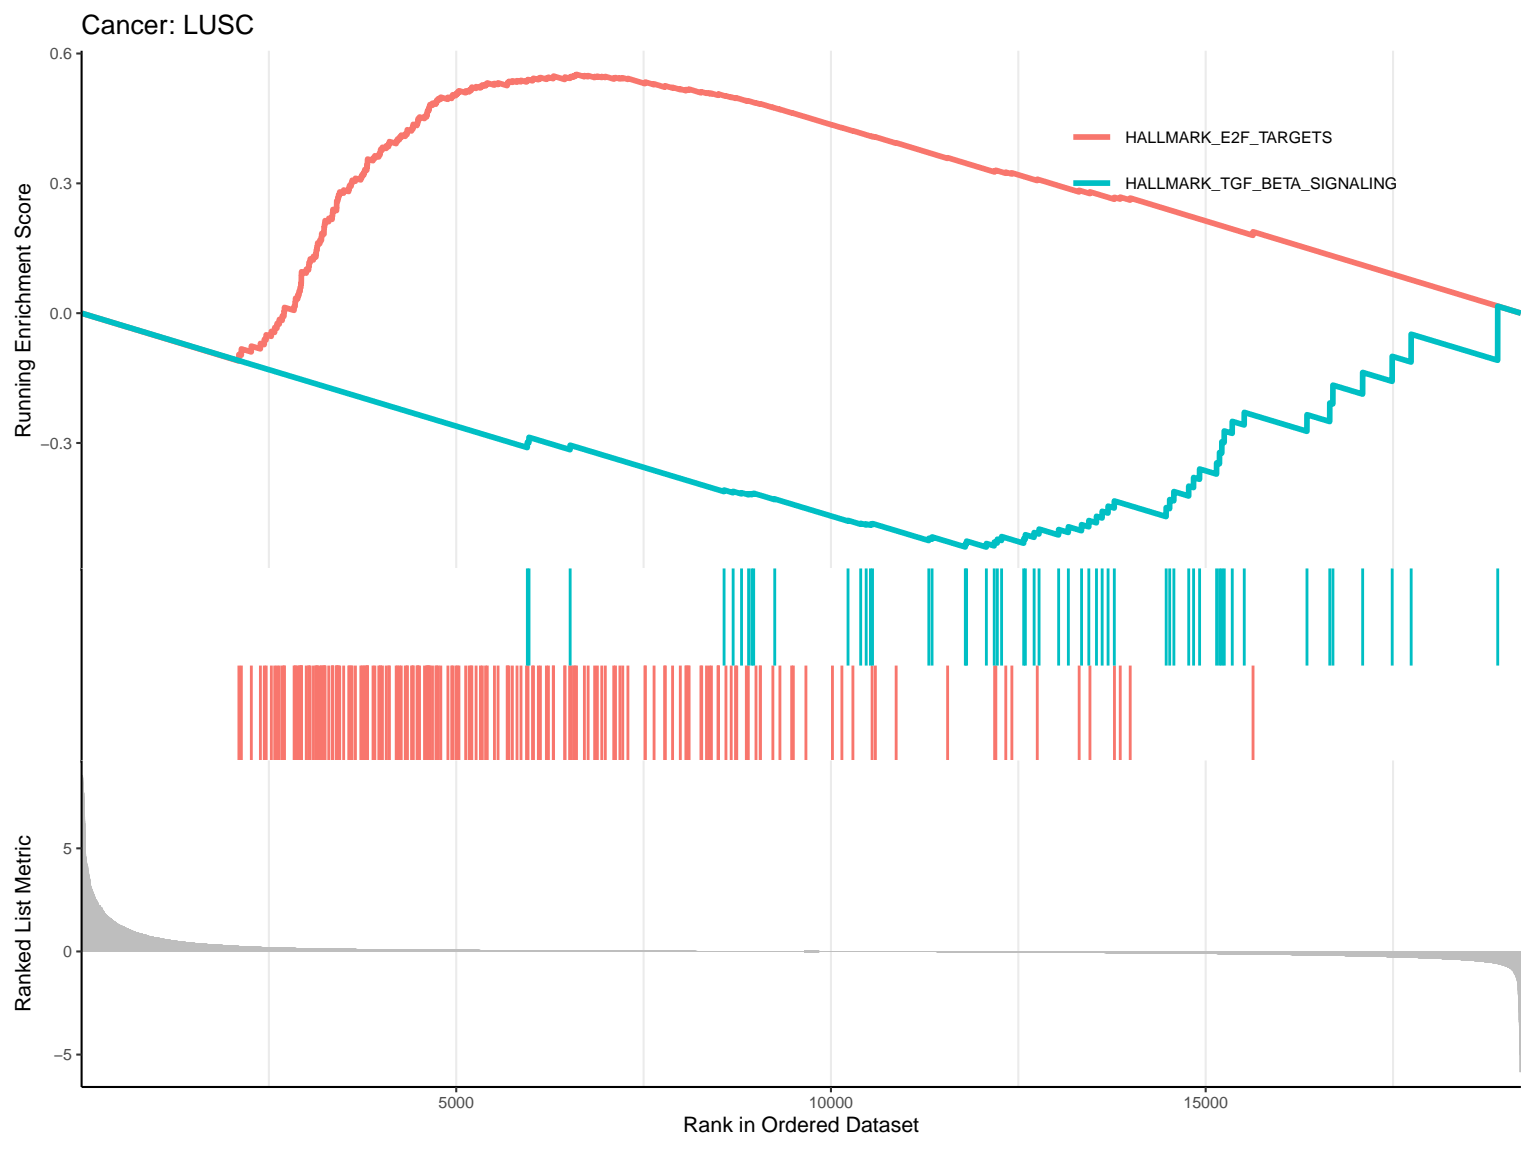

# Cancer: MESO

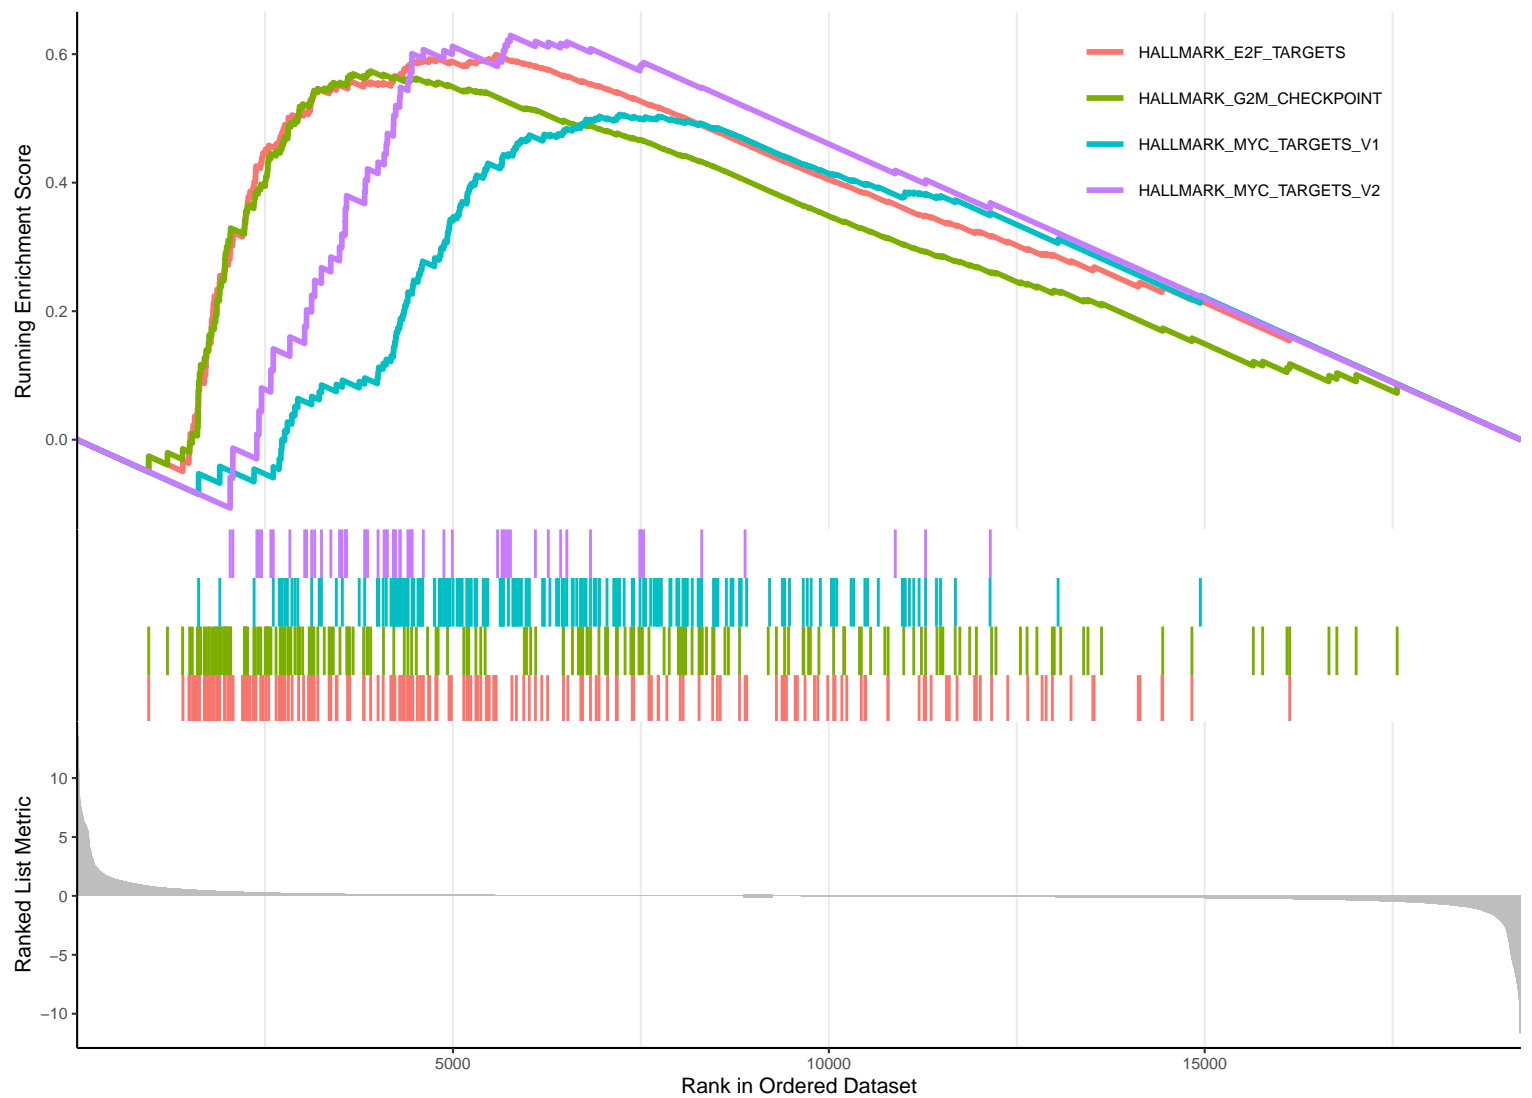

# Cancer: OV

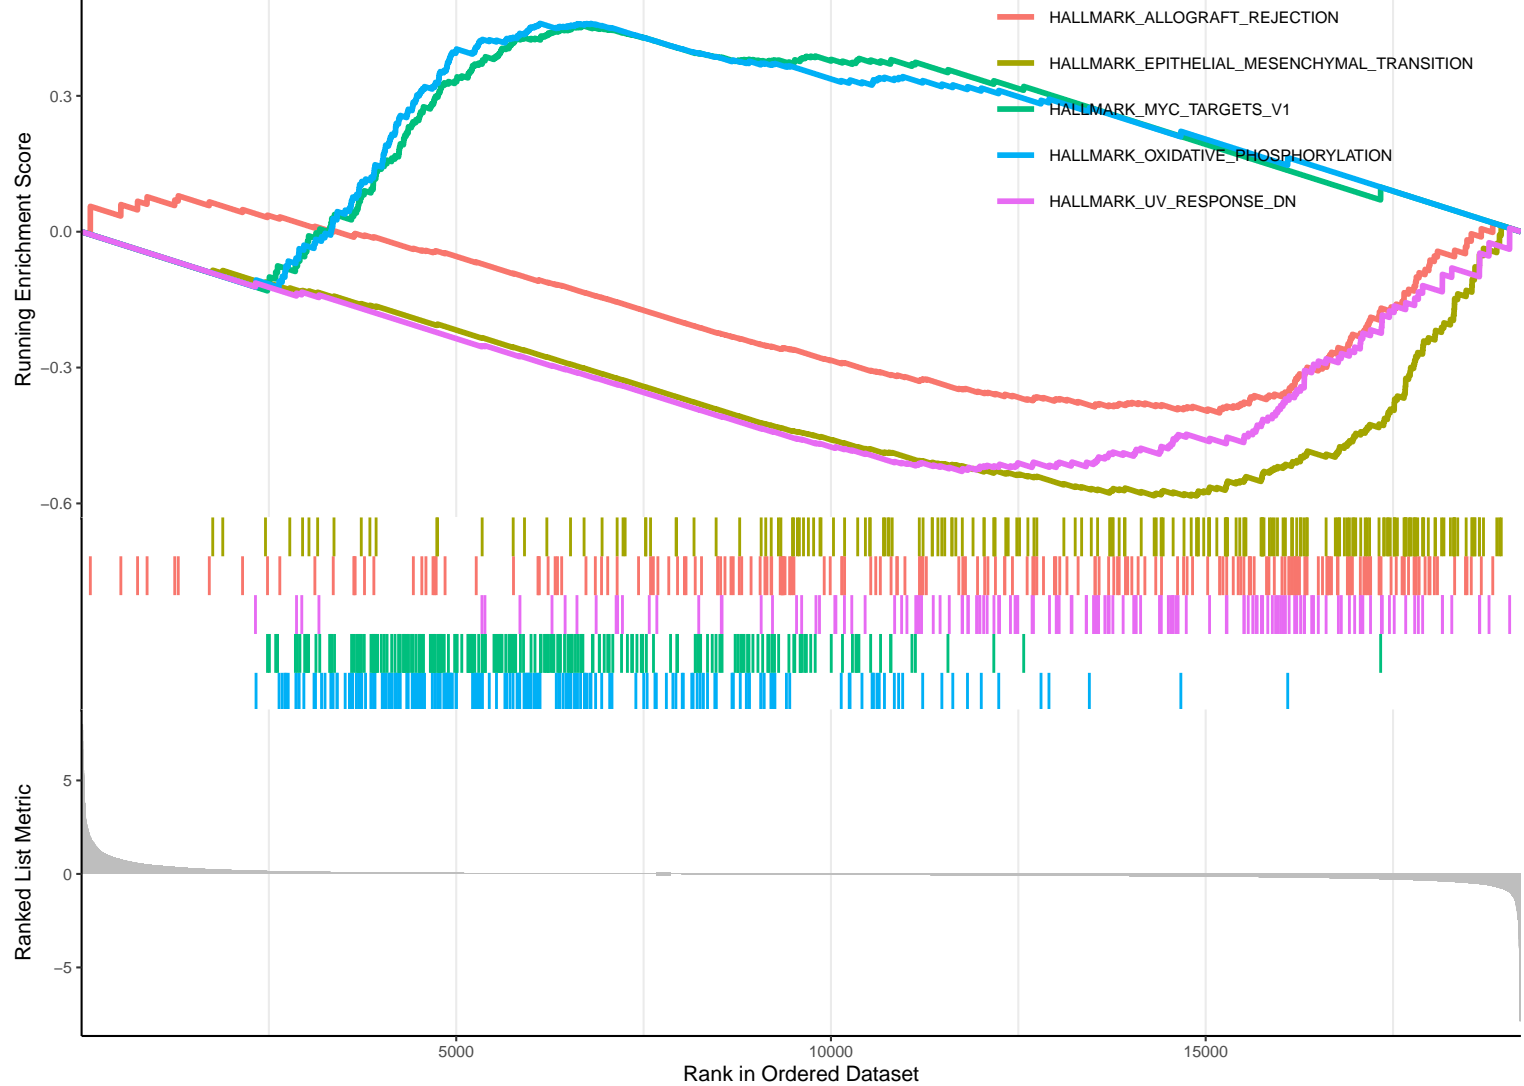

# Cancer: PCPG

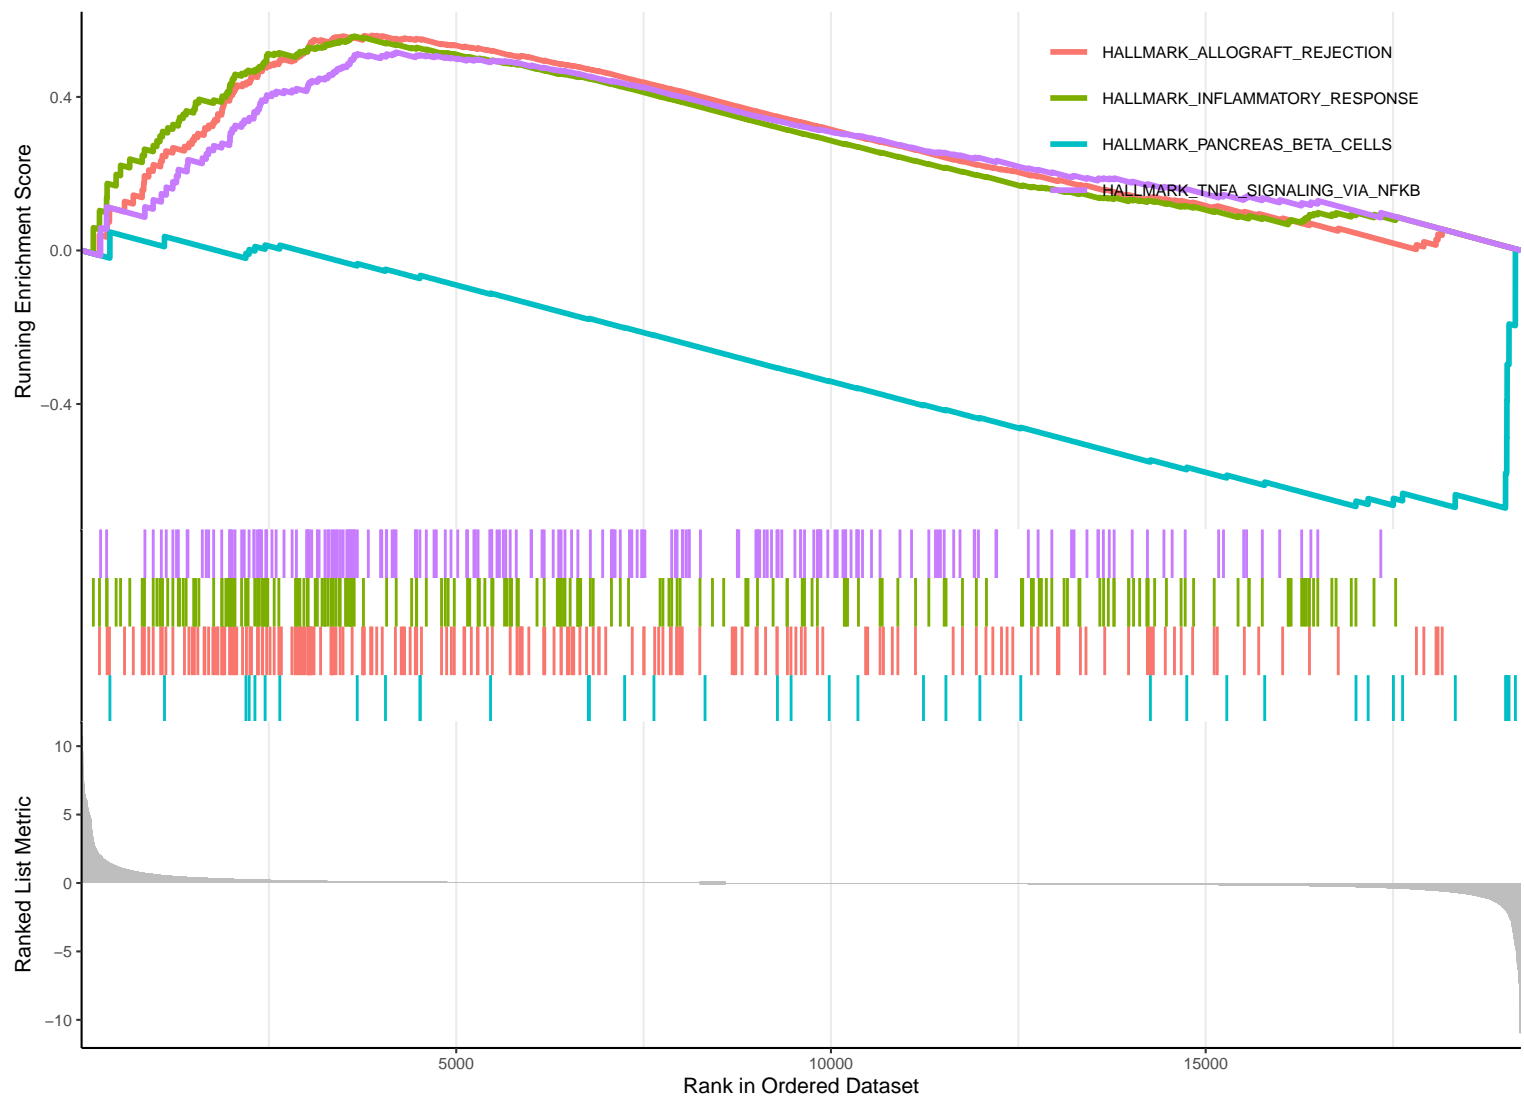



# Cancer: PRAD

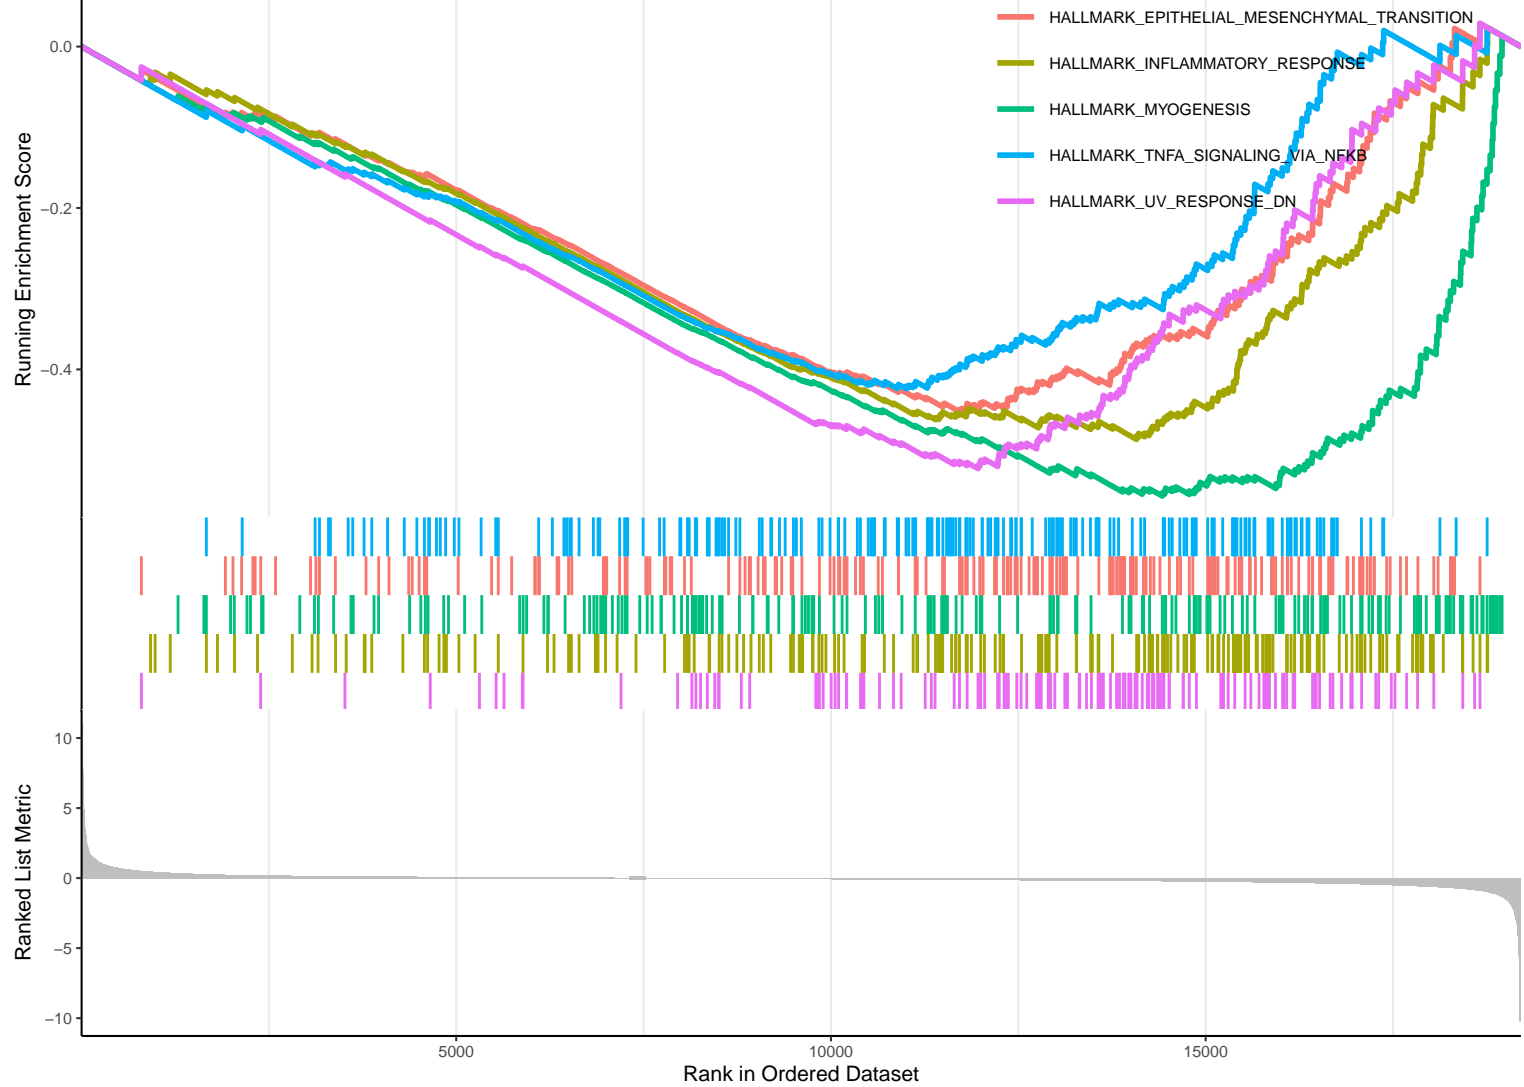

# Cancer: READ

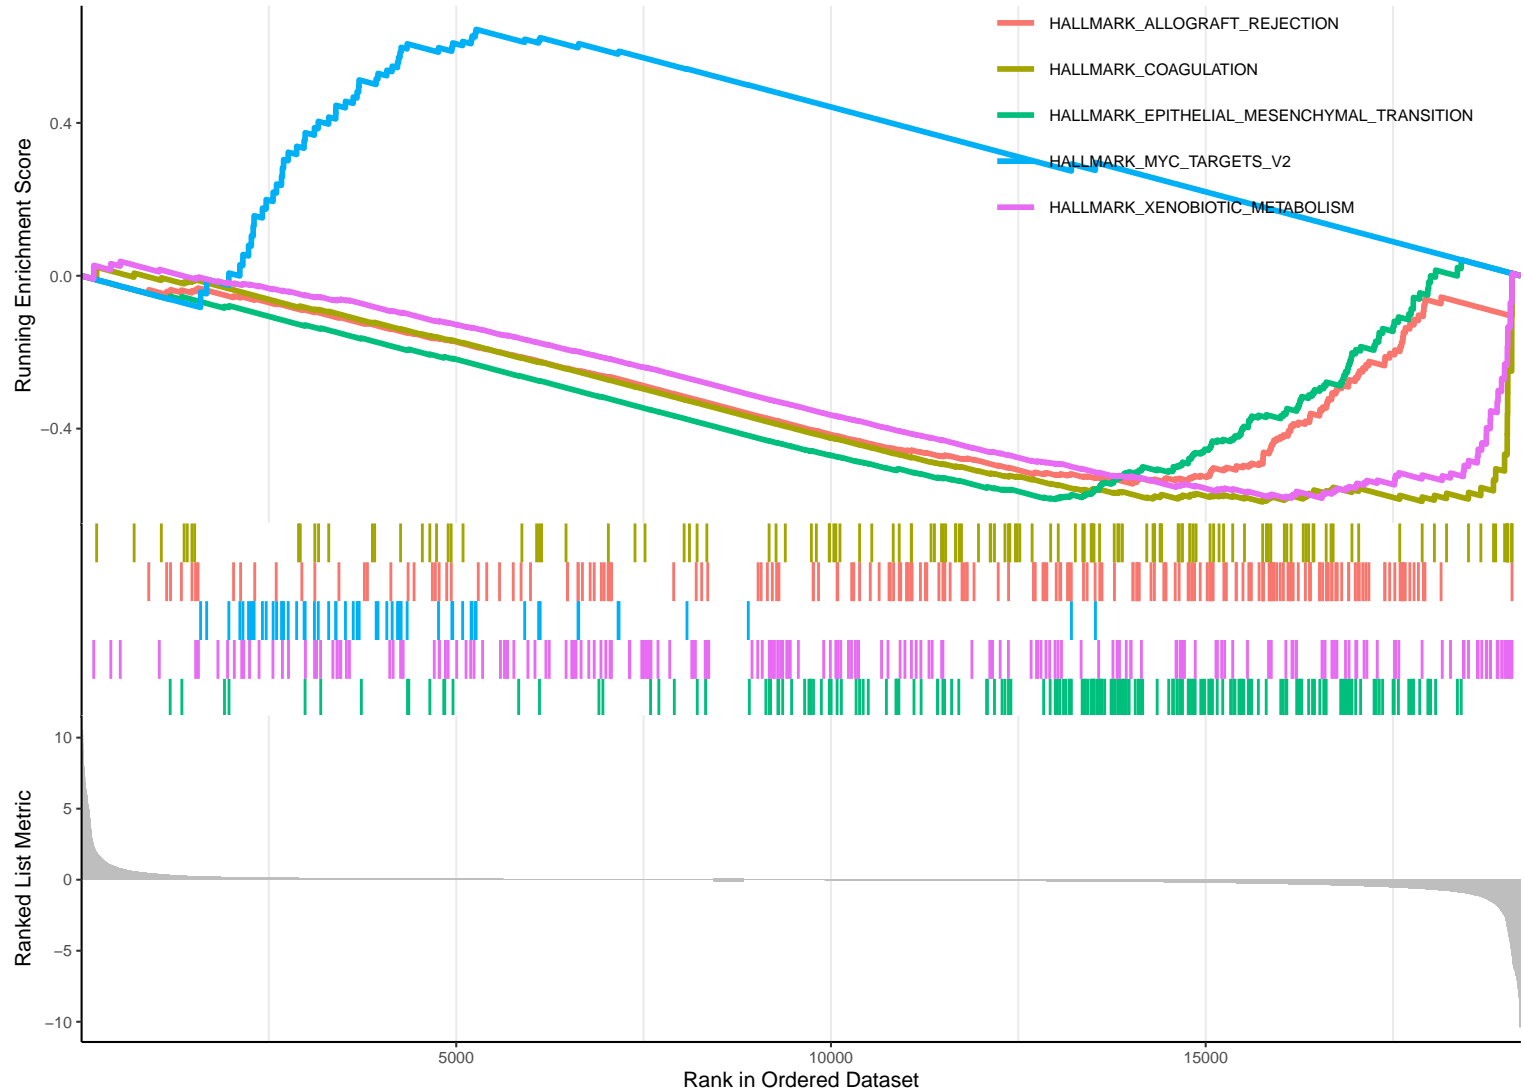

Cancer: SARC

HALLMARK\_ALLOGRAFT\_REJECTION

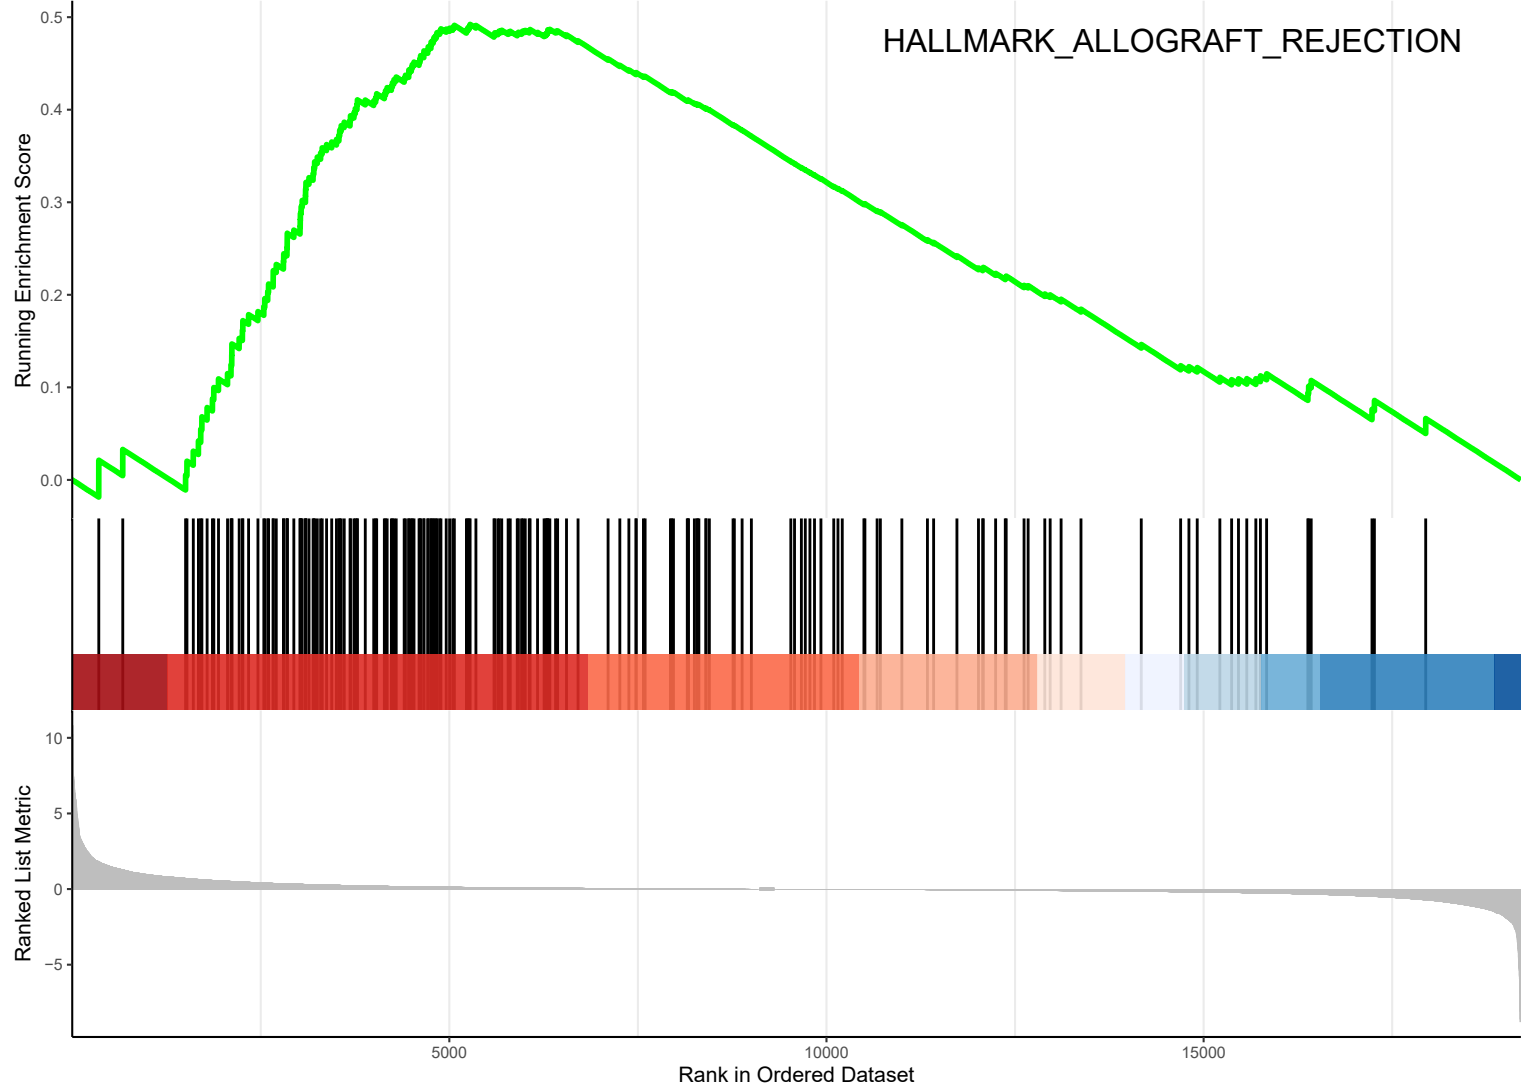

# Cancer: SKCM

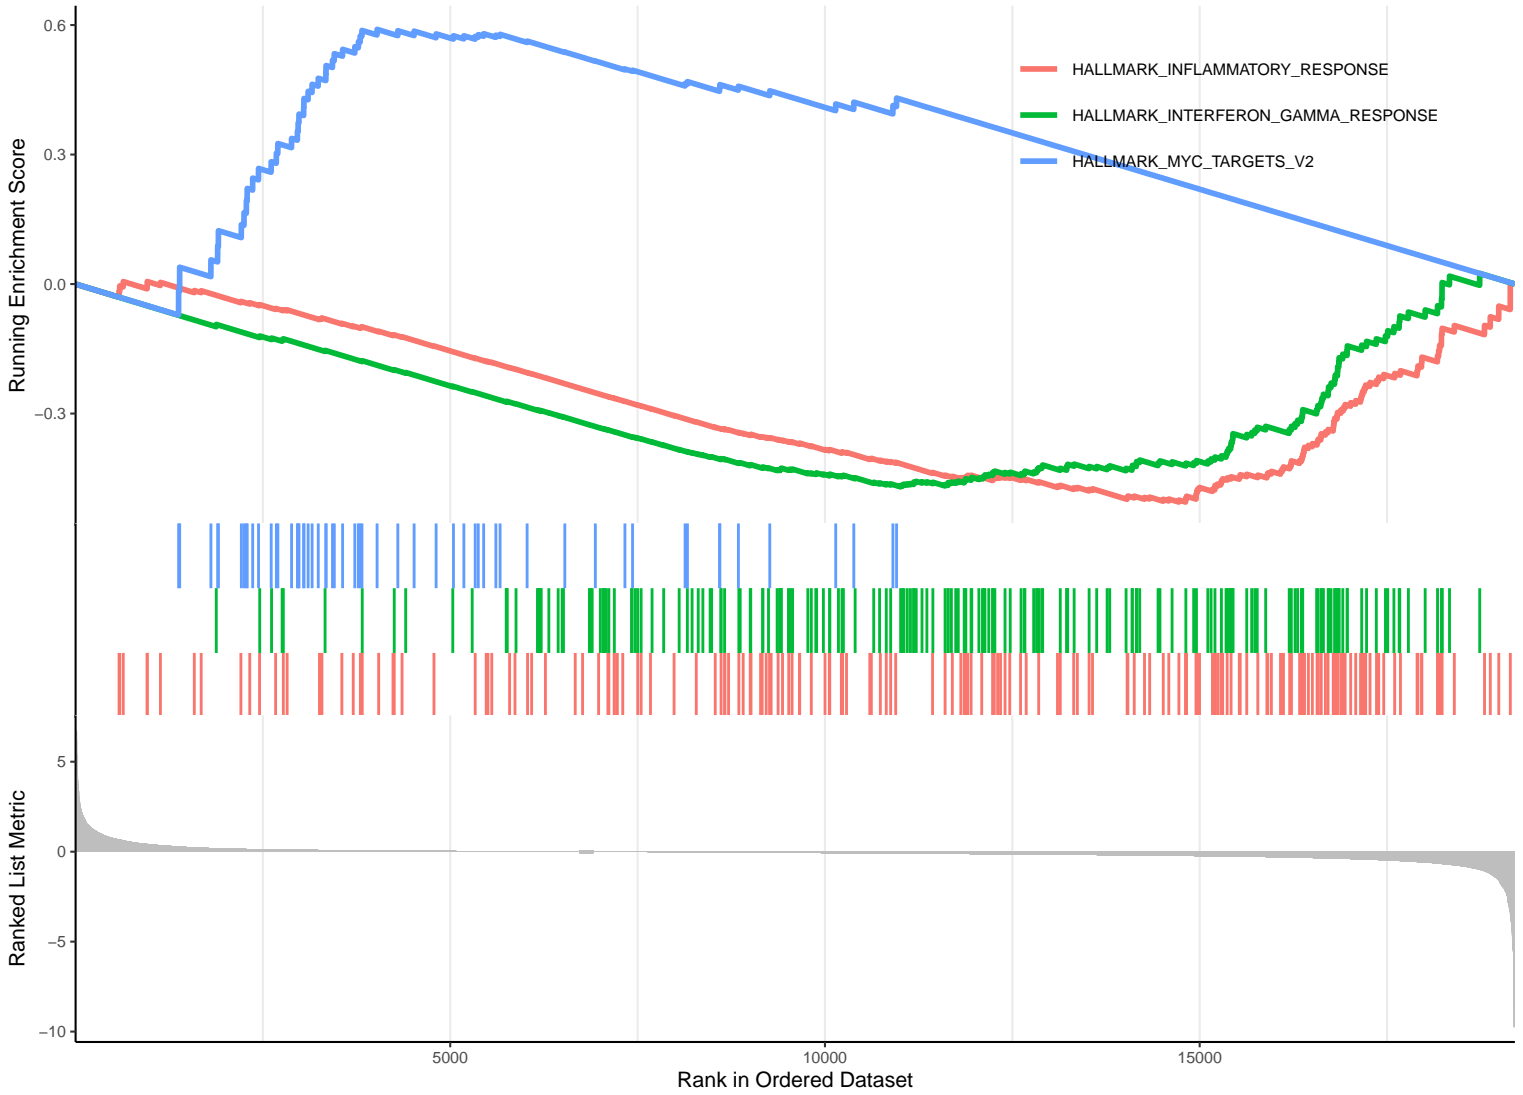

# Cancer: STAD

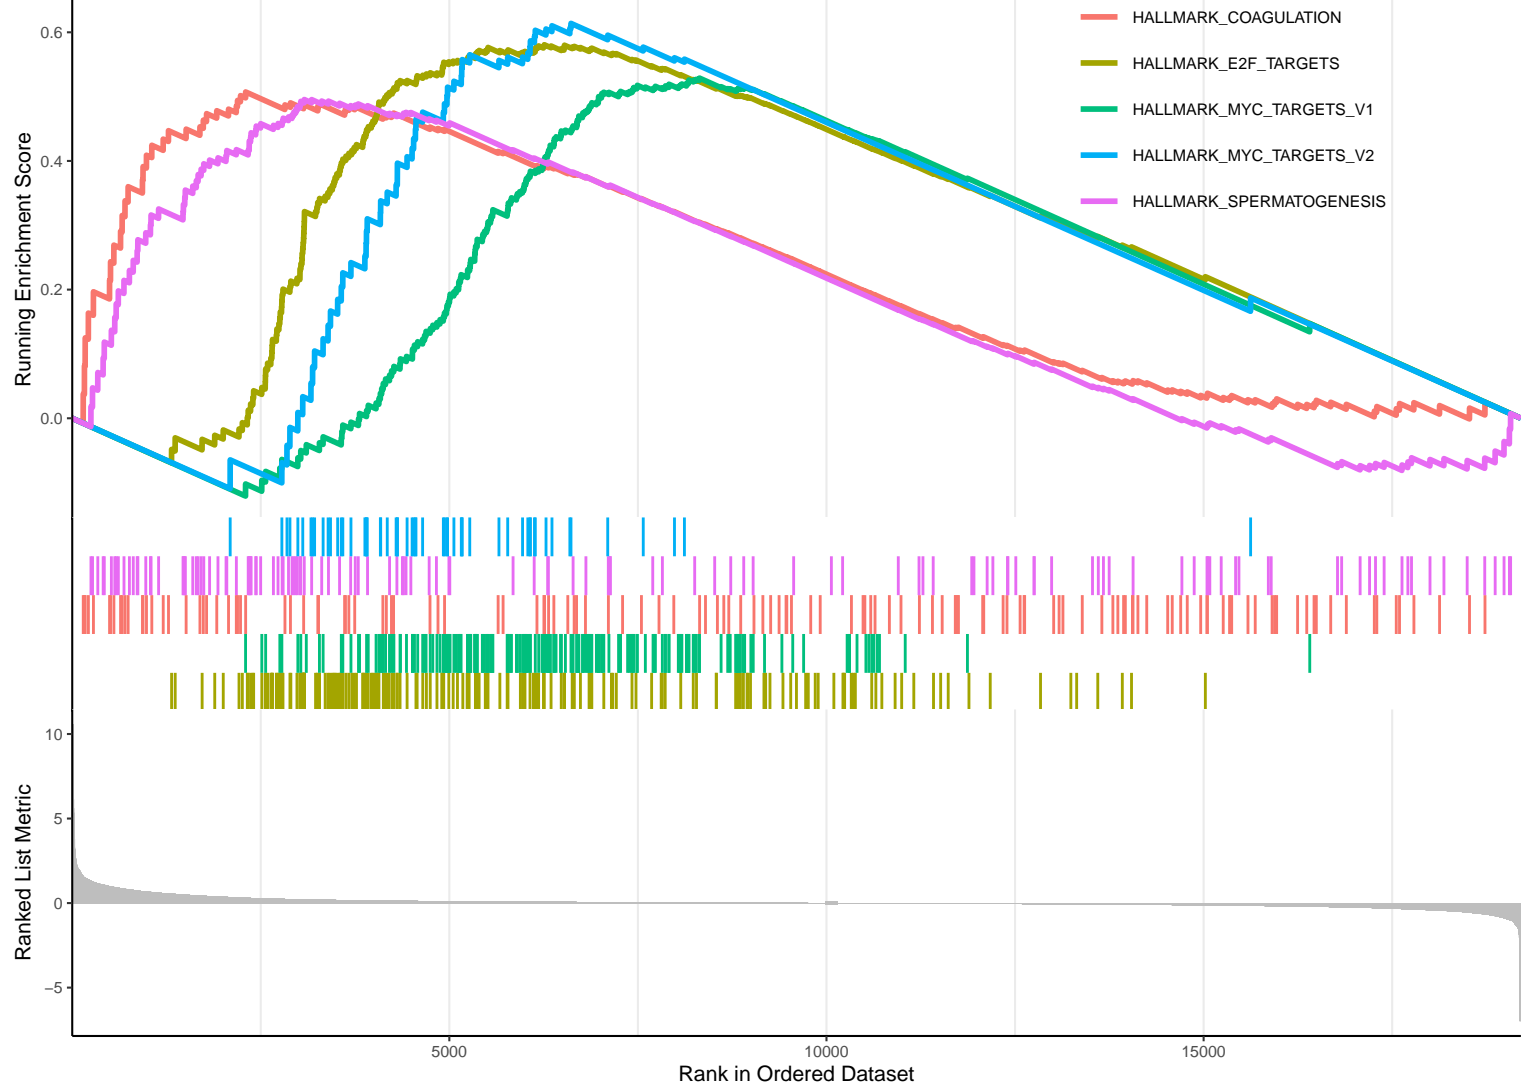

# Cancer: TGCT

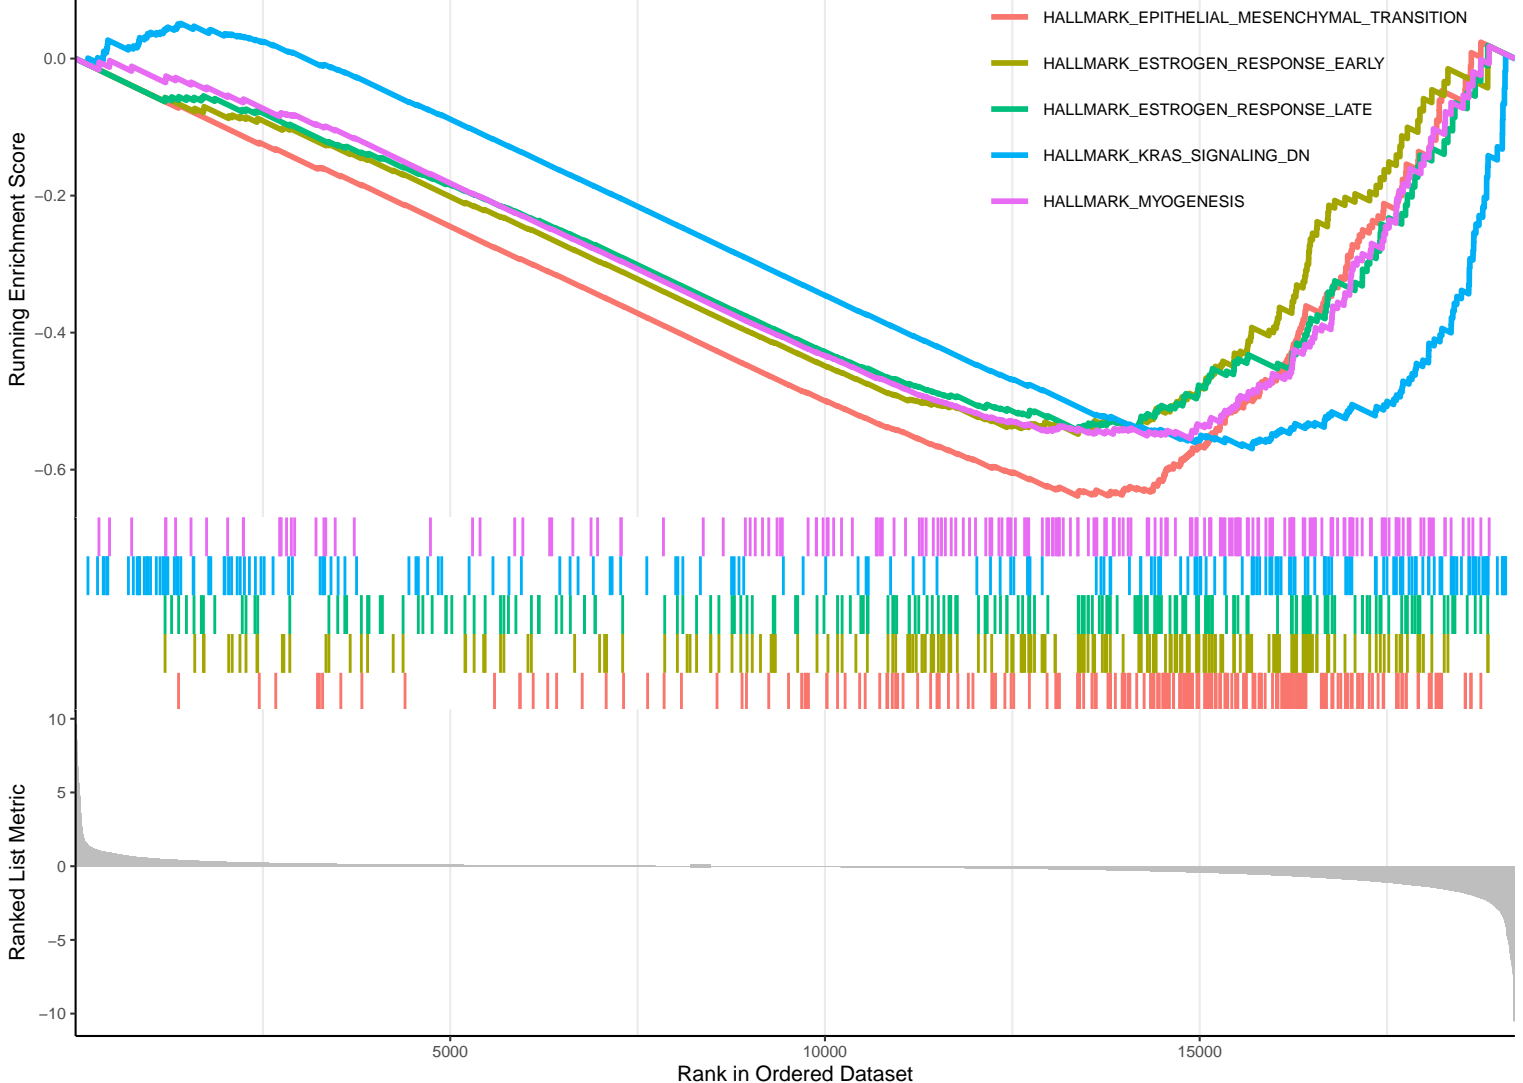

# Cancer: THYM

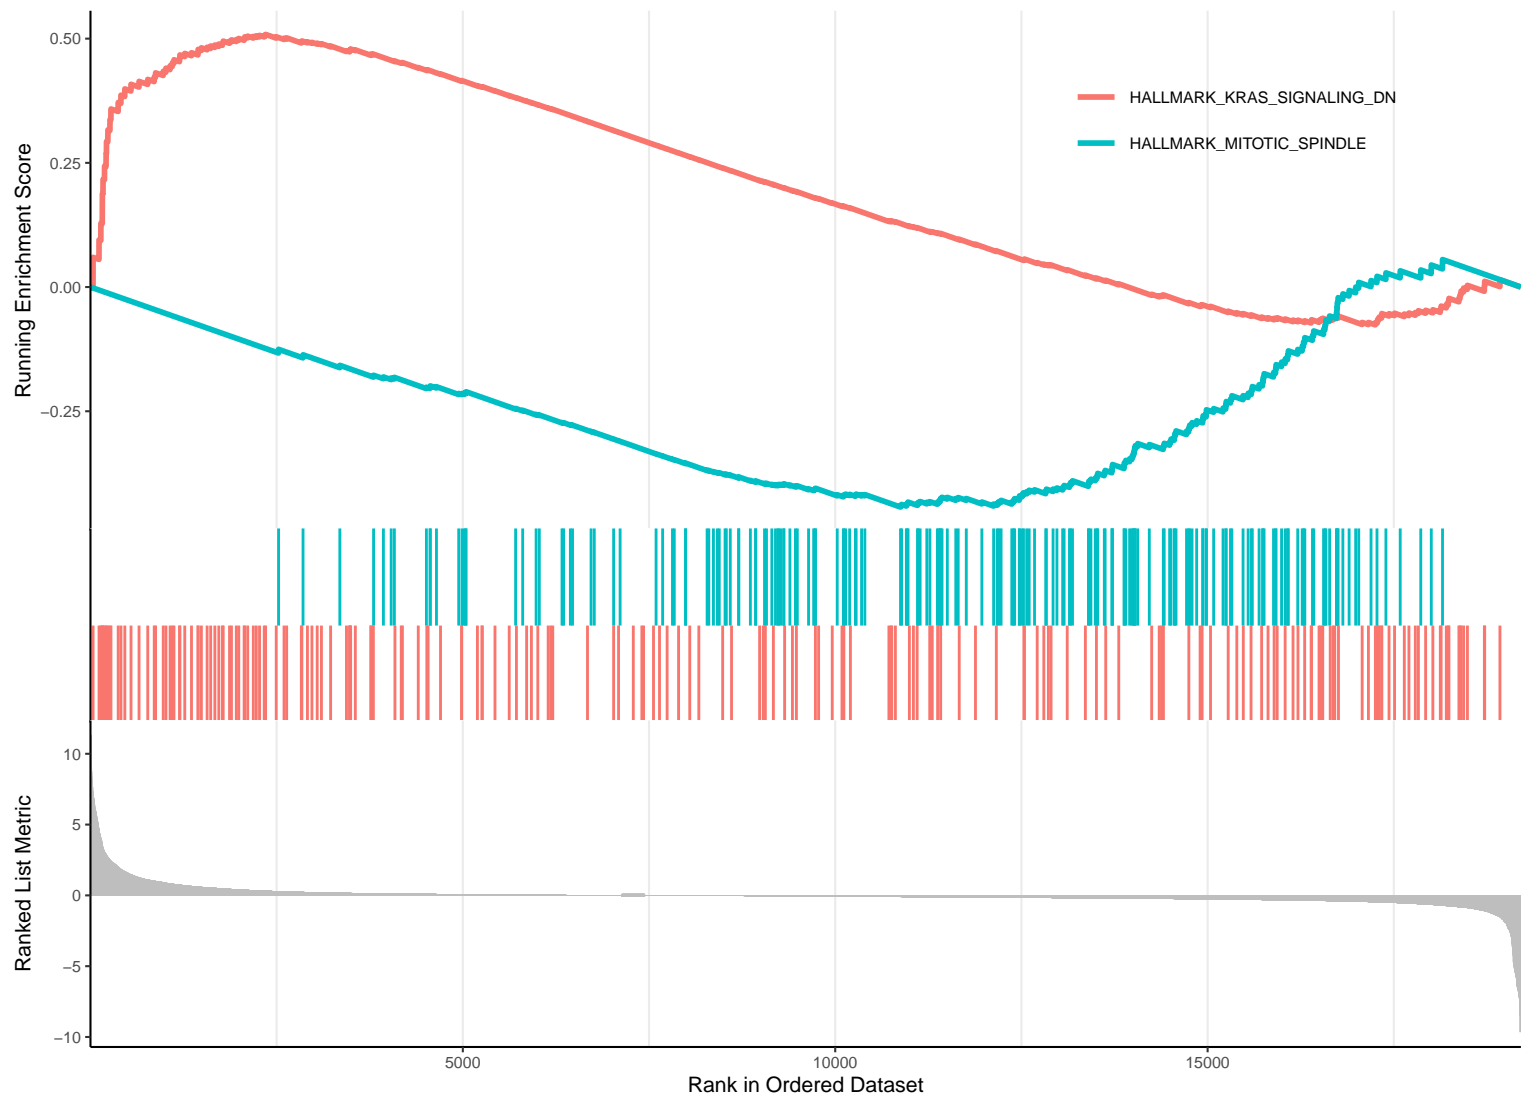

# Cancer: UCEC

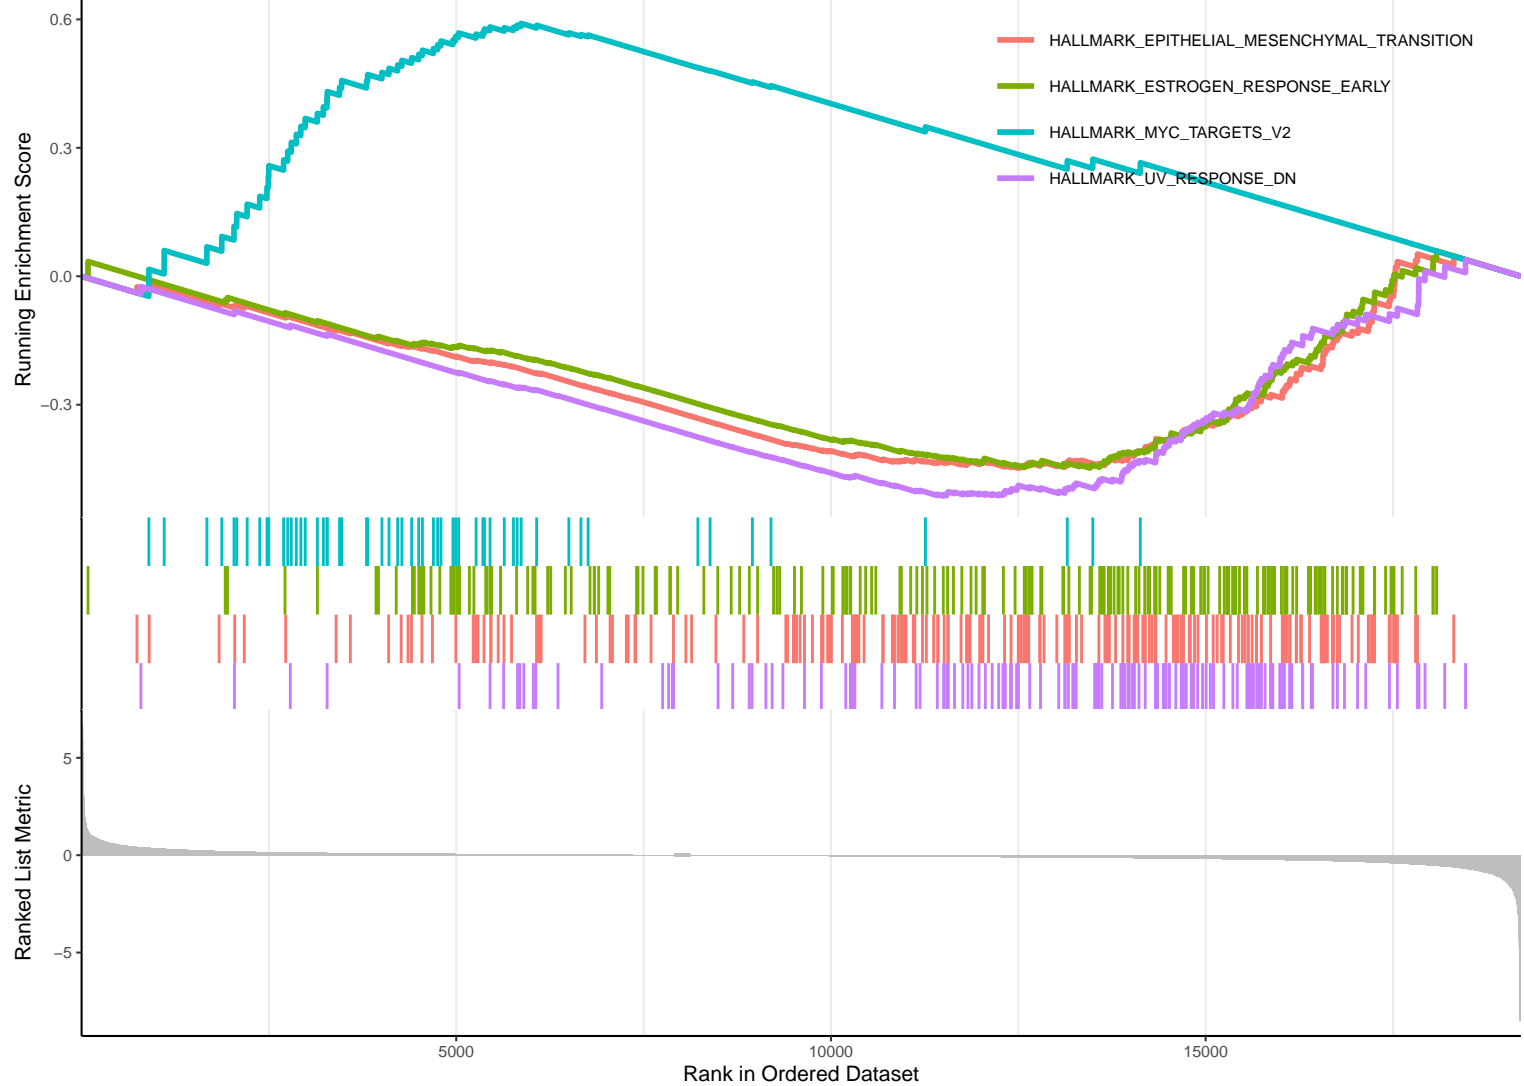



Cancer: UCS

HALLMARK\_MYOGENESIS

Running Enrichment Score

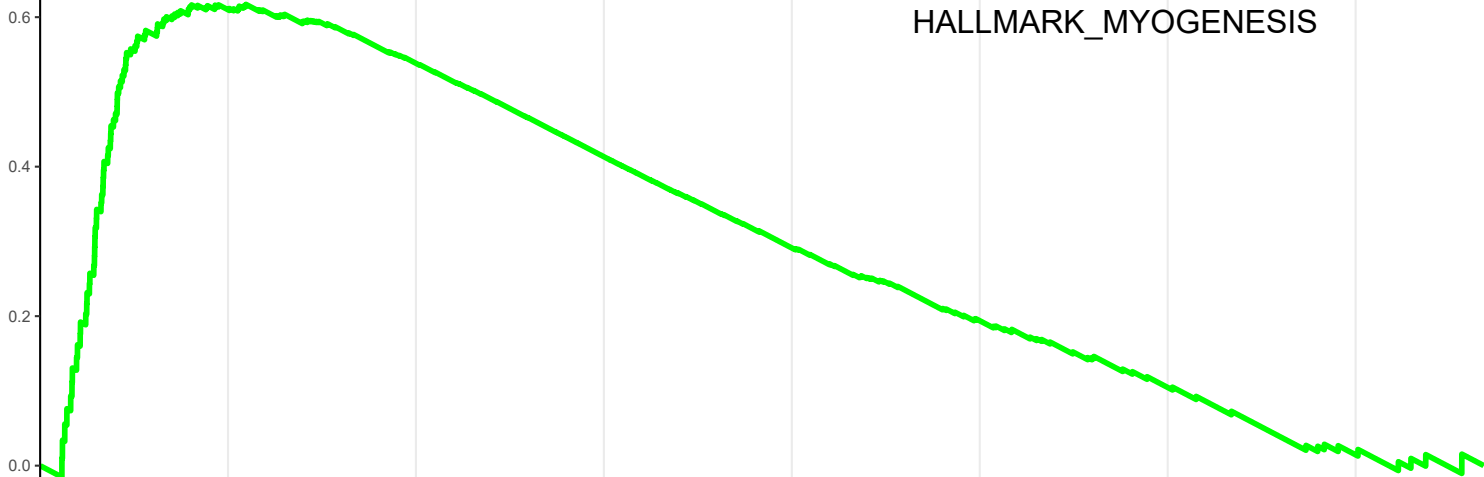

Ranked List Metric

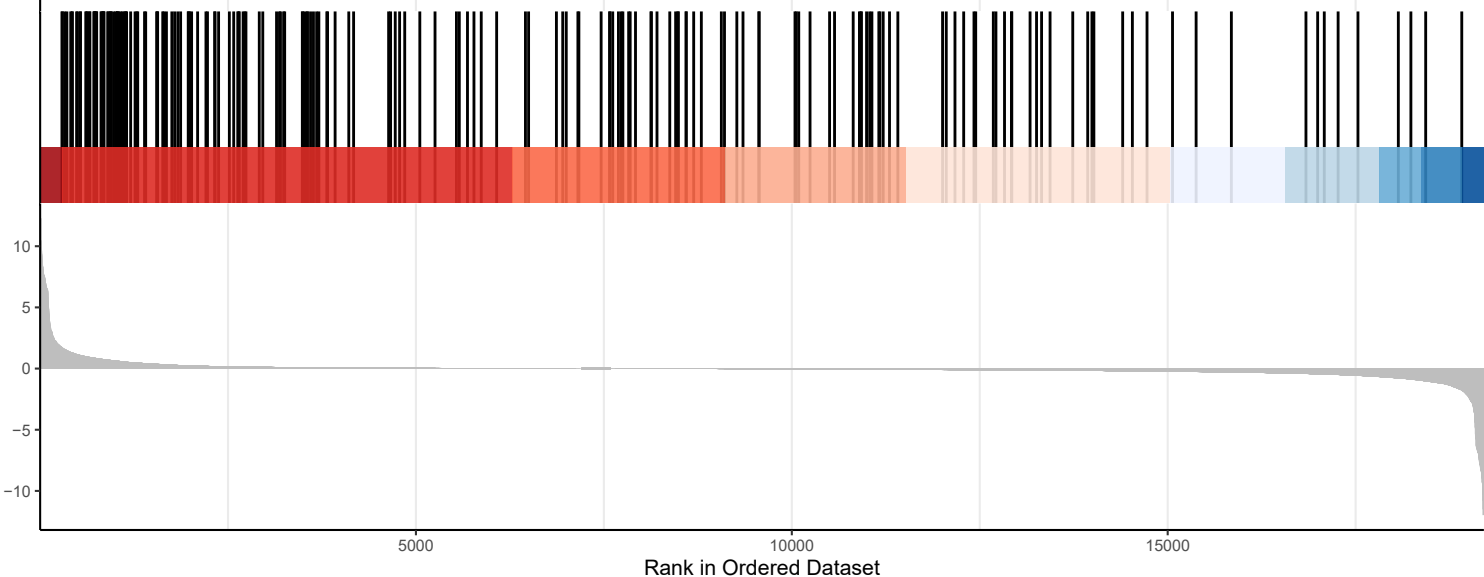

Rank in Ordered Dataset

Cancer: ACC

HALLMARK\_EPITHELIAL\_MESENCHYMAL\_TRANSITION

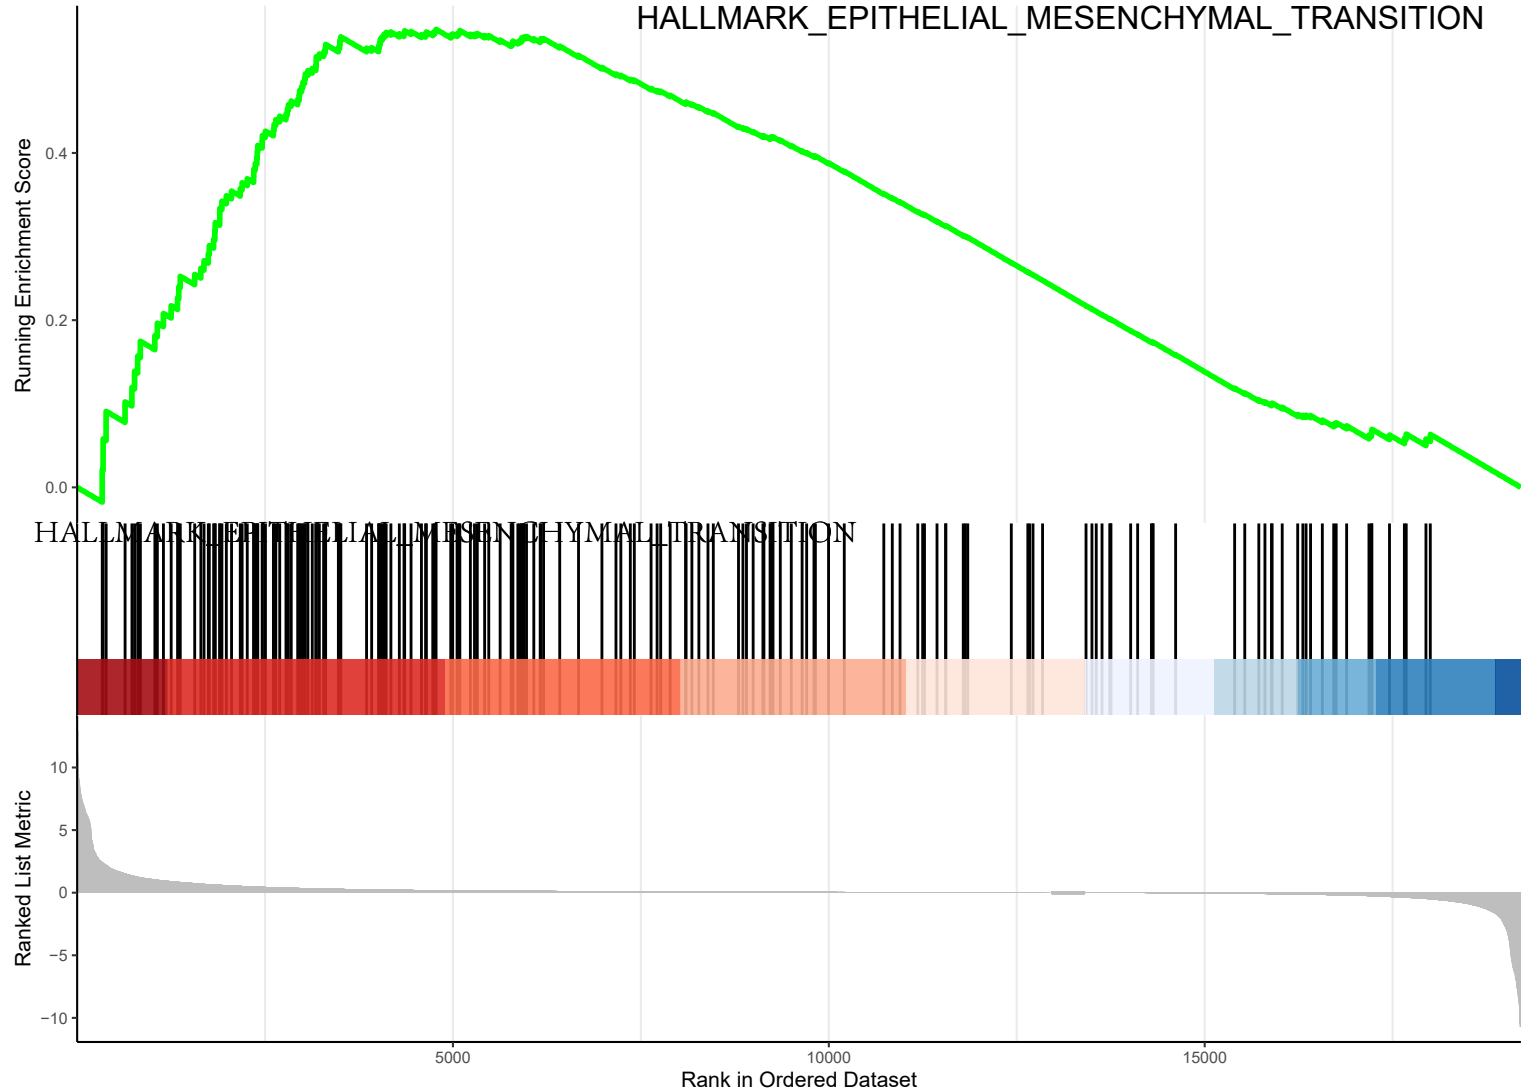

Cancer: BLCA

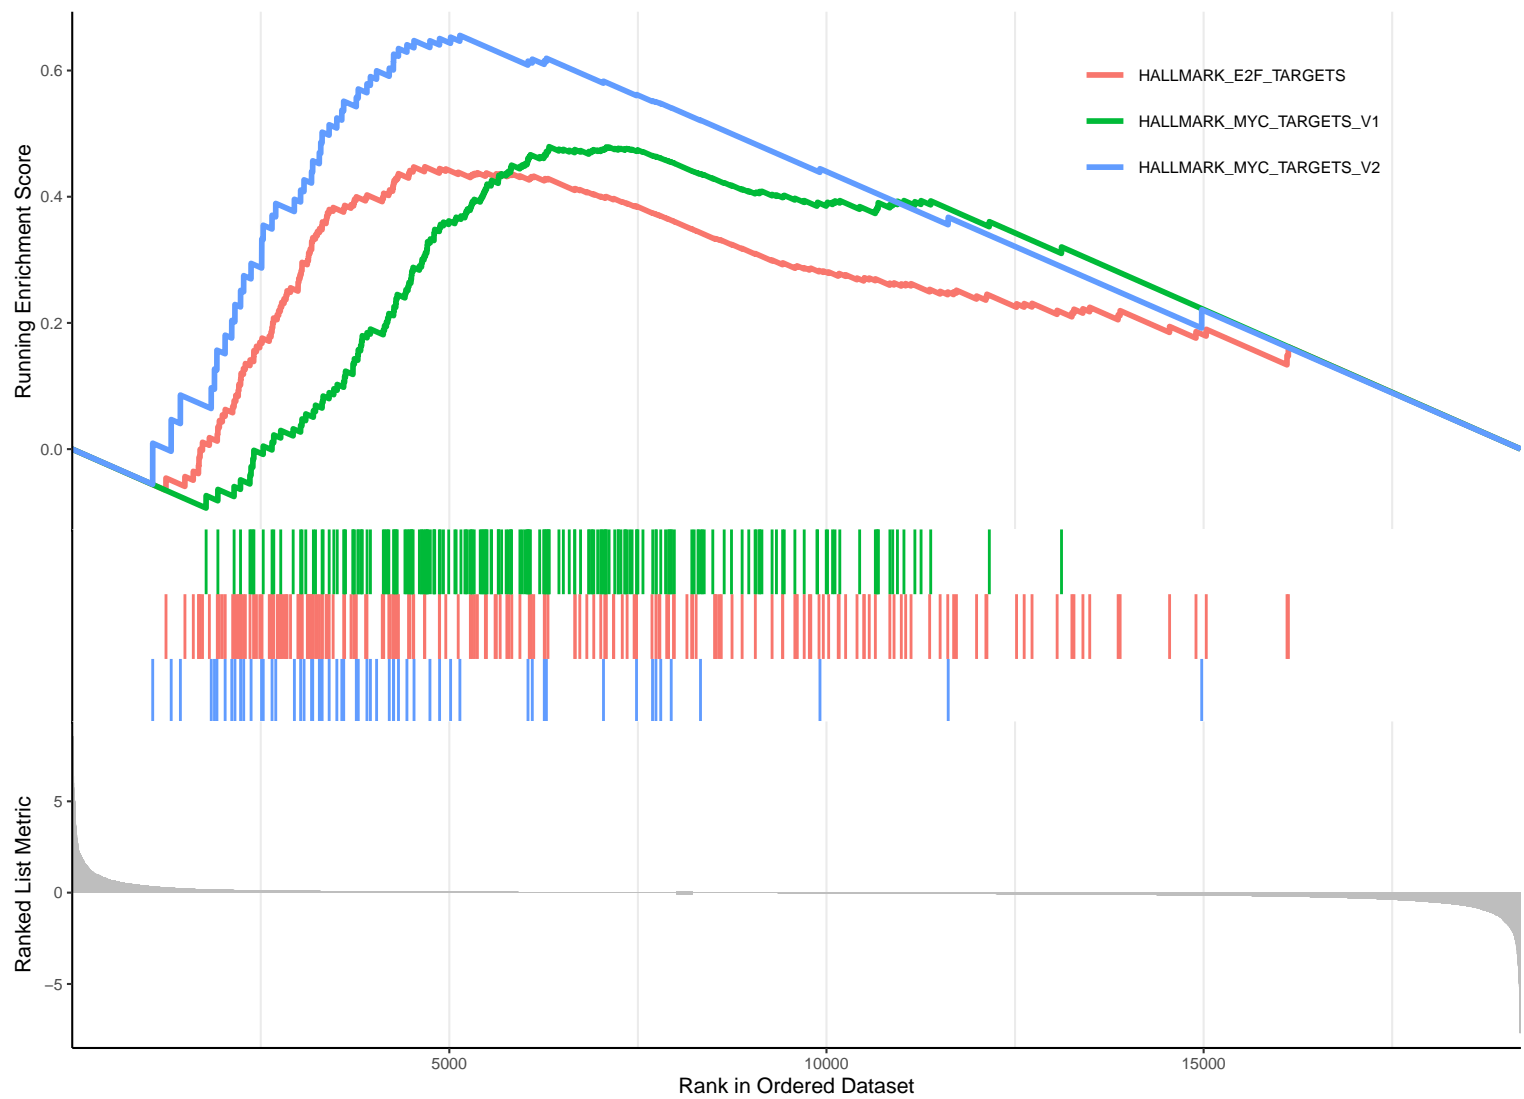

# Cancer: CESC

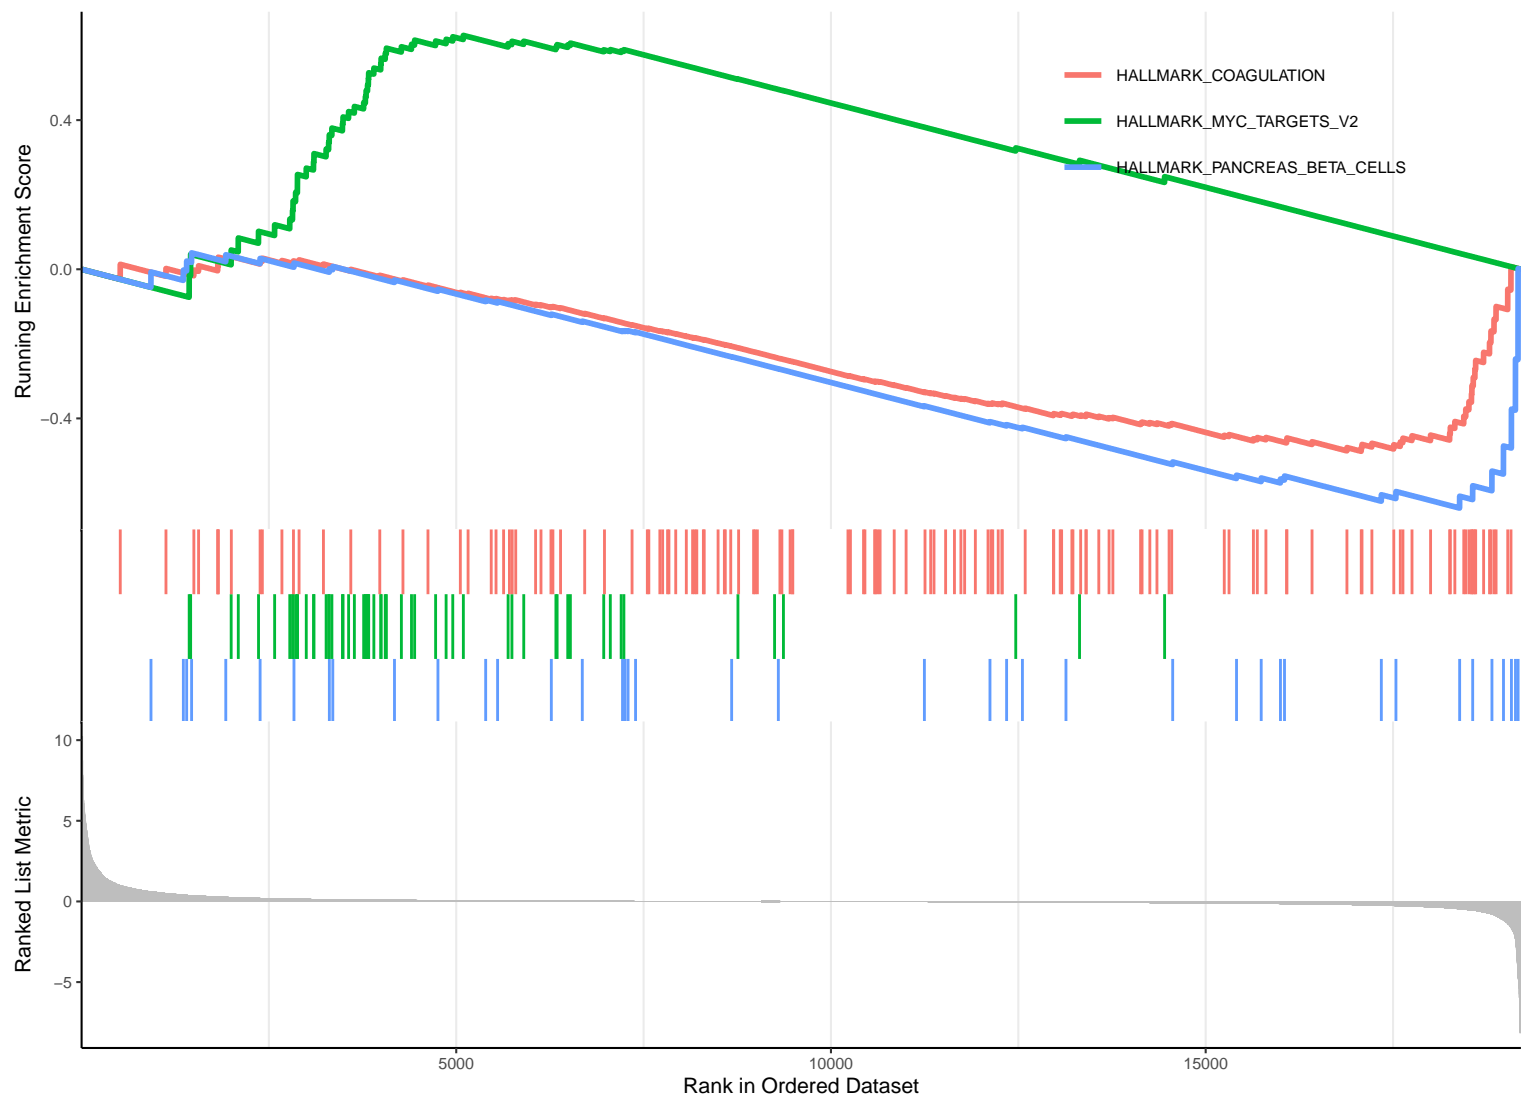

Cancer: CHOL

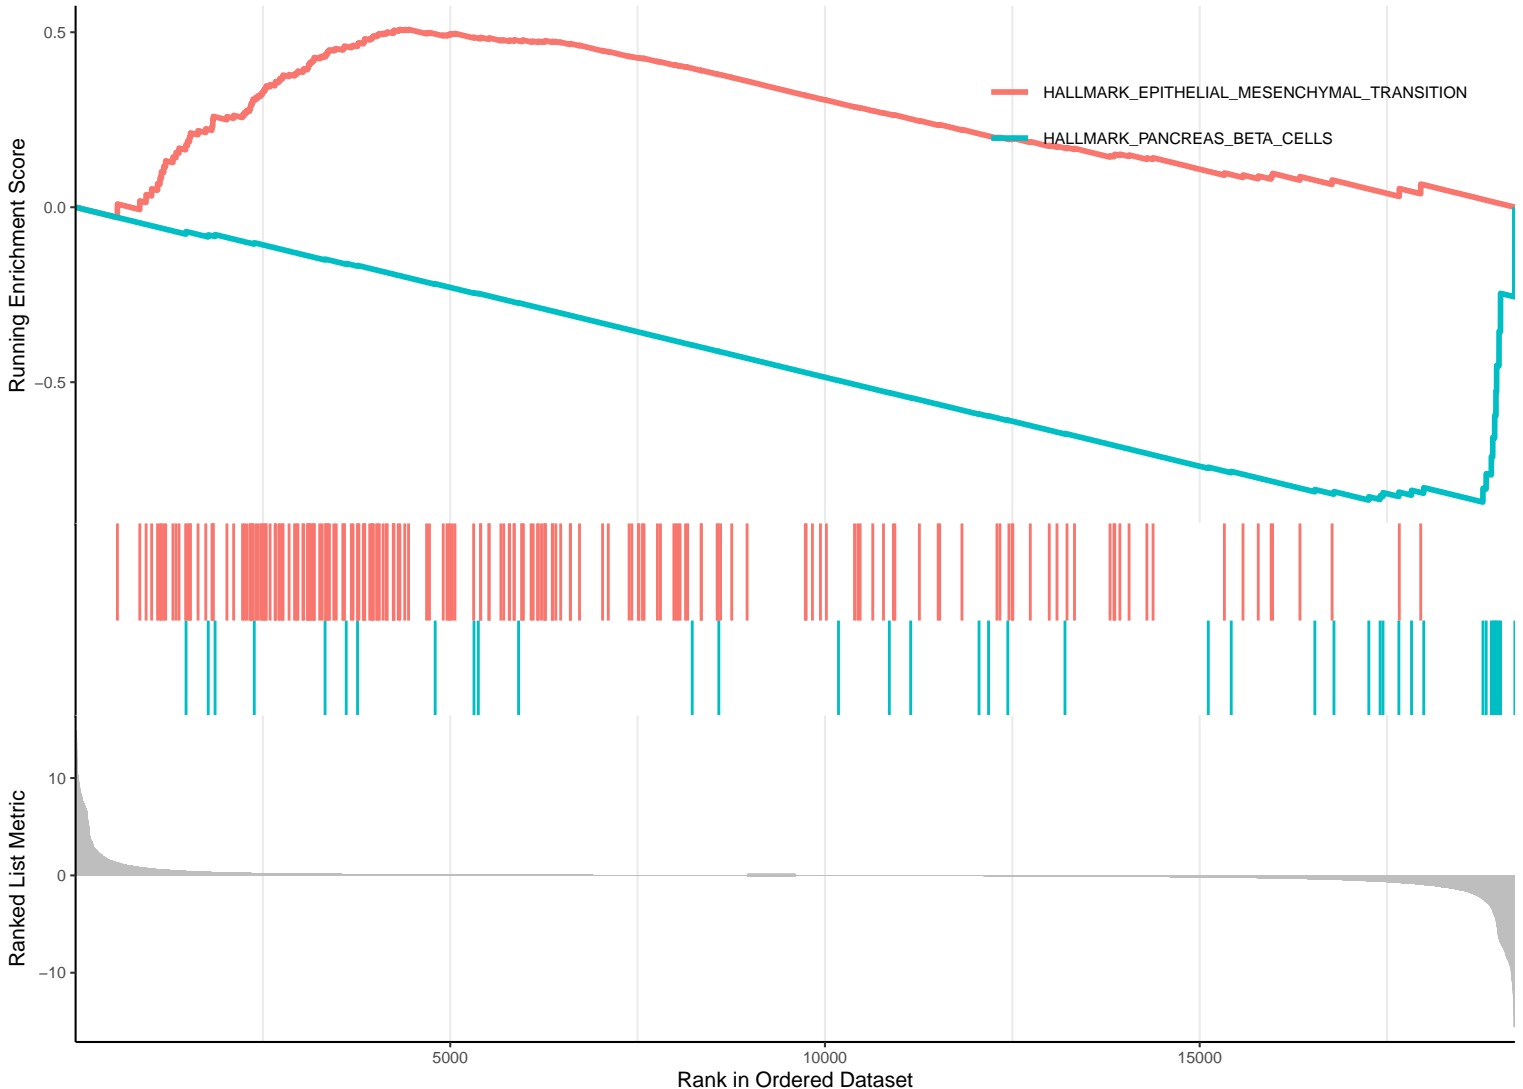

# Cancer: DLBC

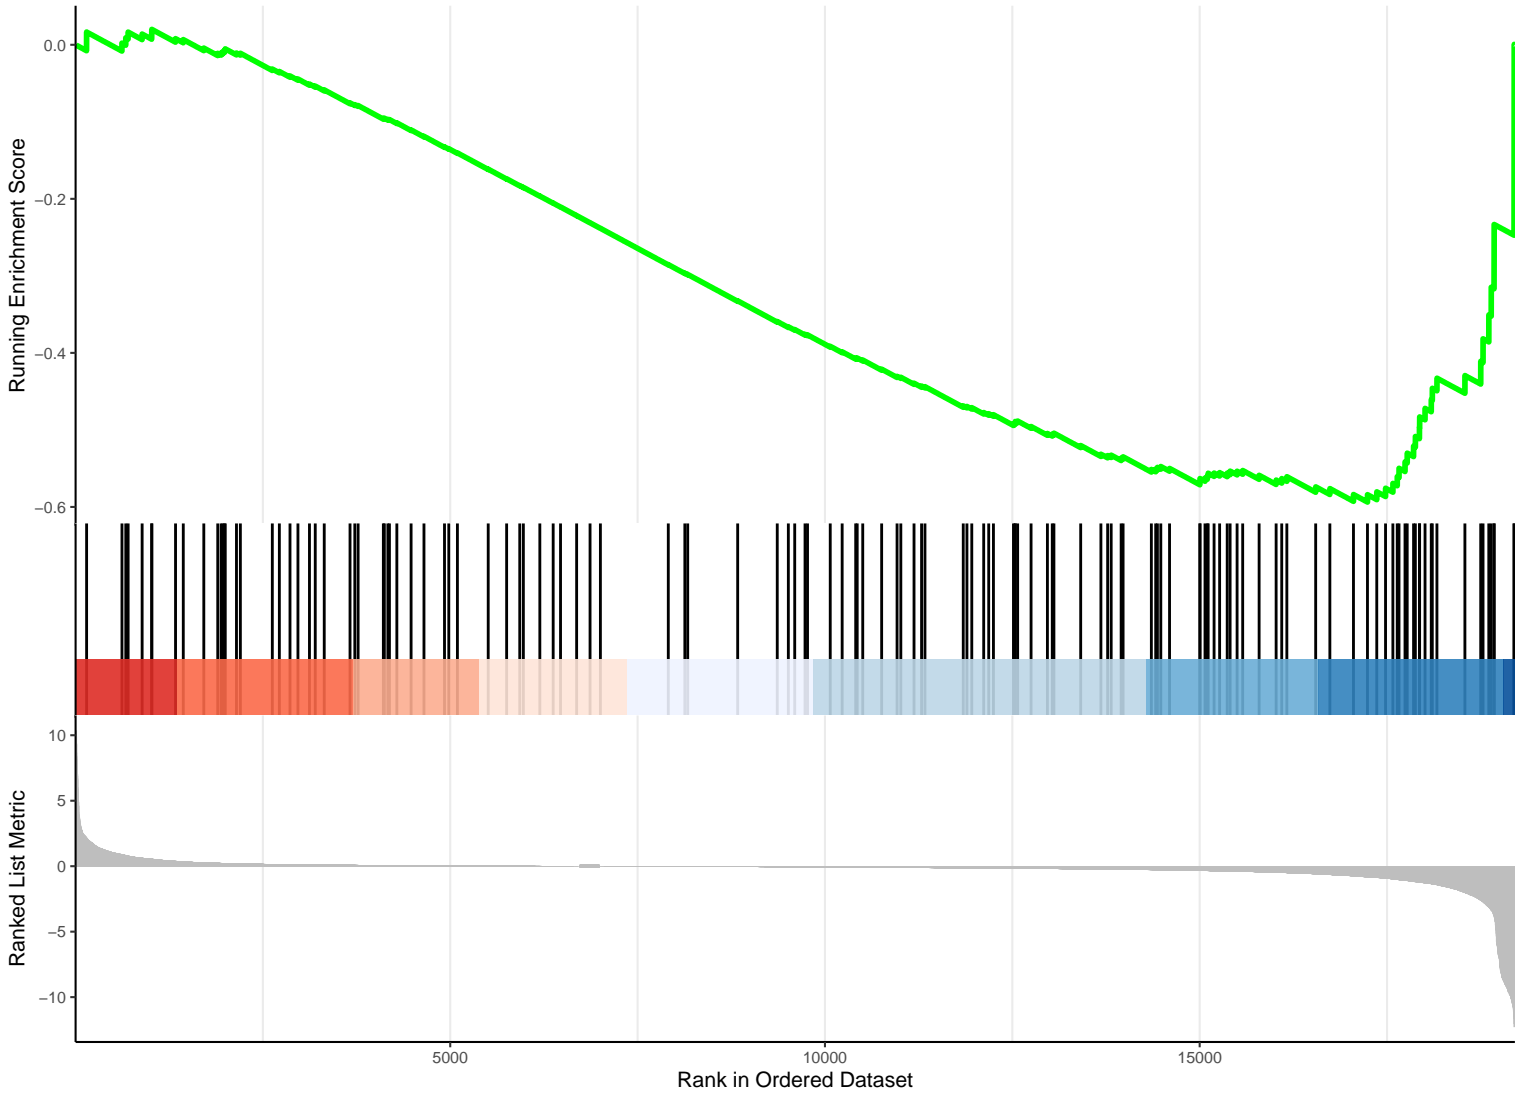

# Cancer: ESCA

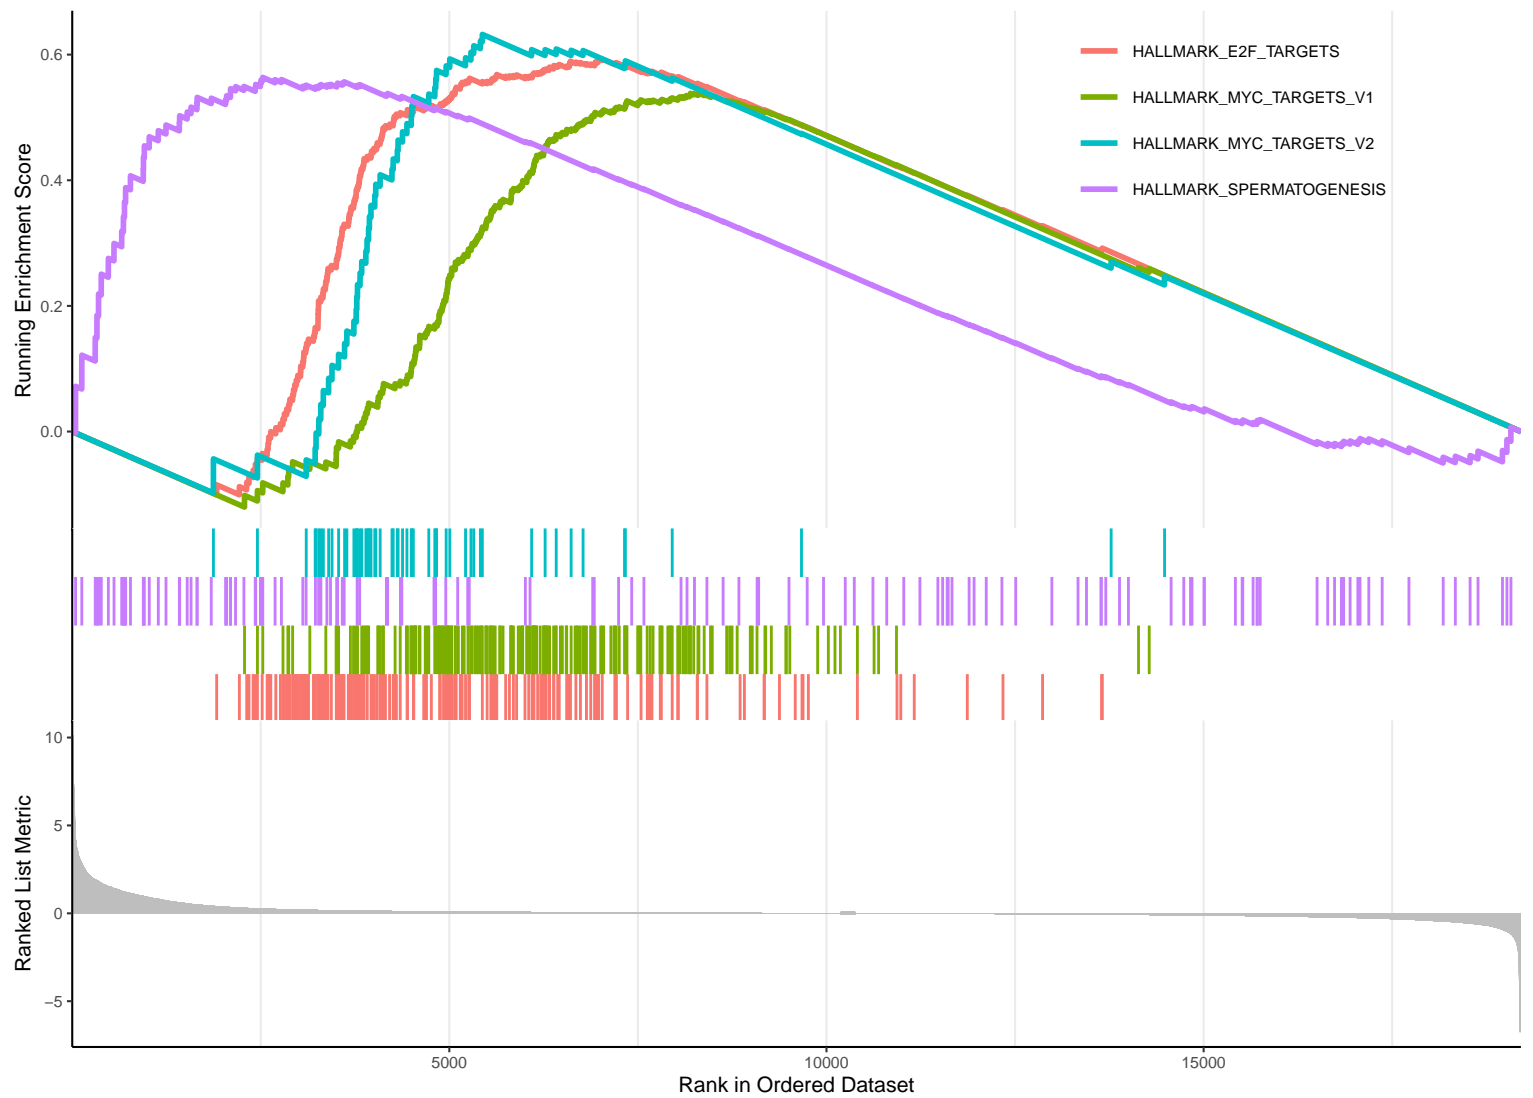

# Cancer: GBM

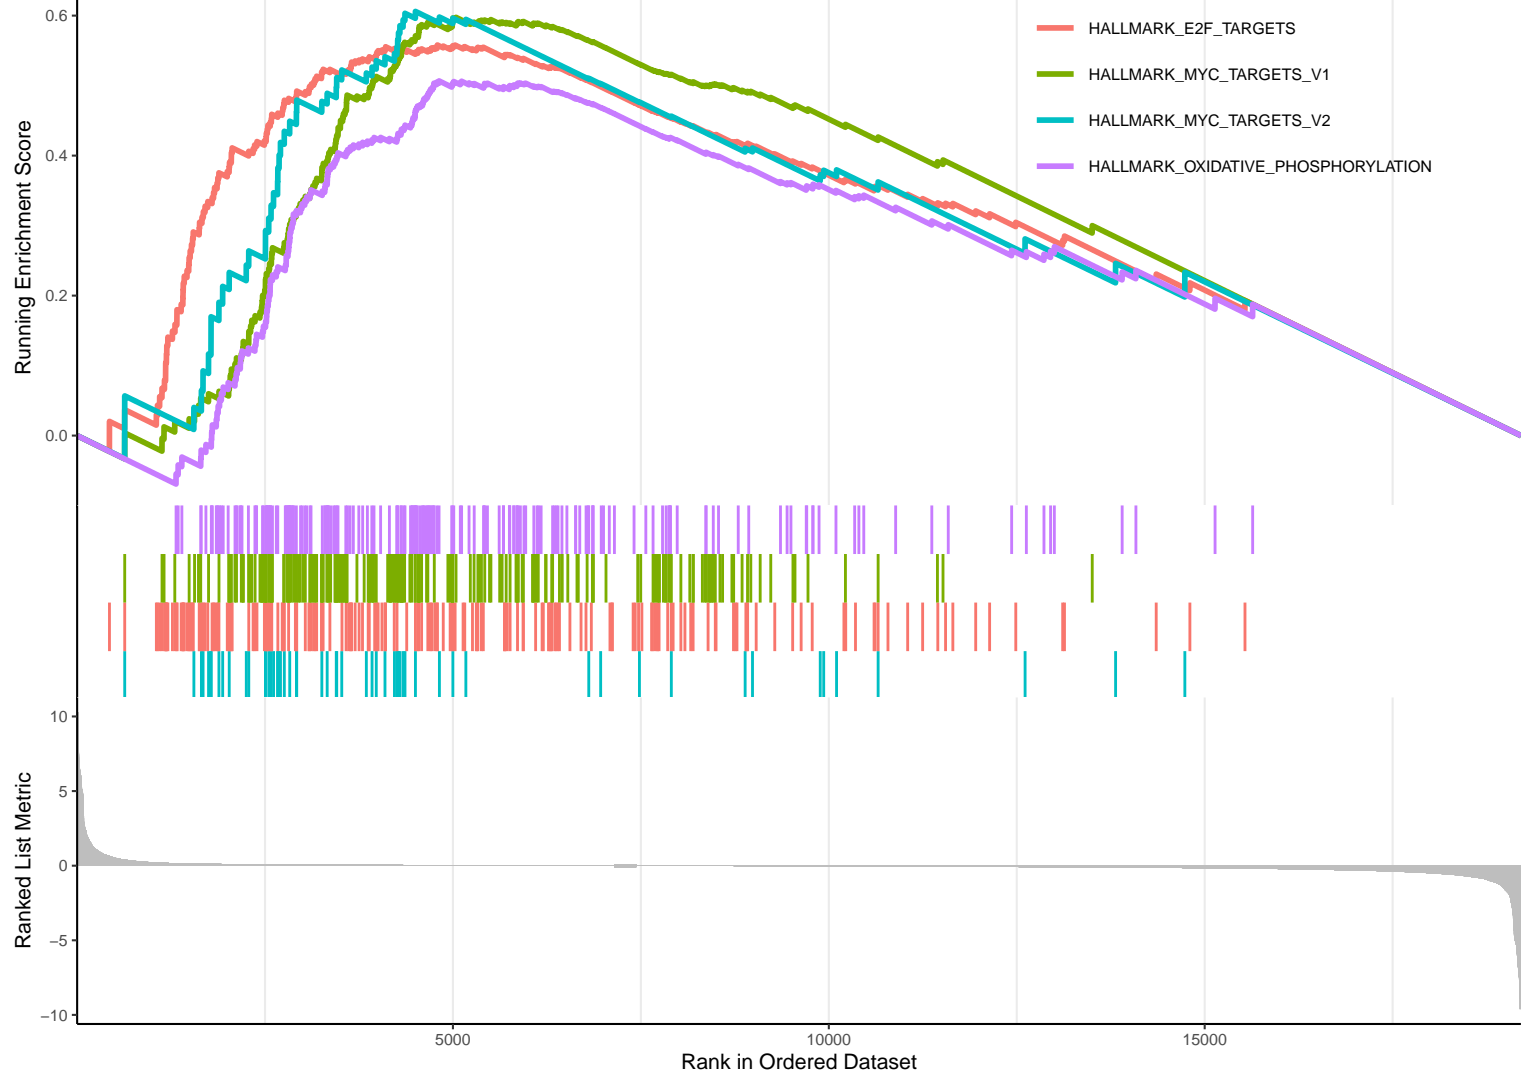

Supplement: Image_9.pdf [file Image_9.pdf]
